# Supplementary material for: Diversity and Advantages of Culturable Endophytic Fungi from Tea (Camellia sinensis)
Source: MDPI journal article supplement (doi:10.3390/jof9121191), 2023-12-13
Supplement: s1 [file s1]

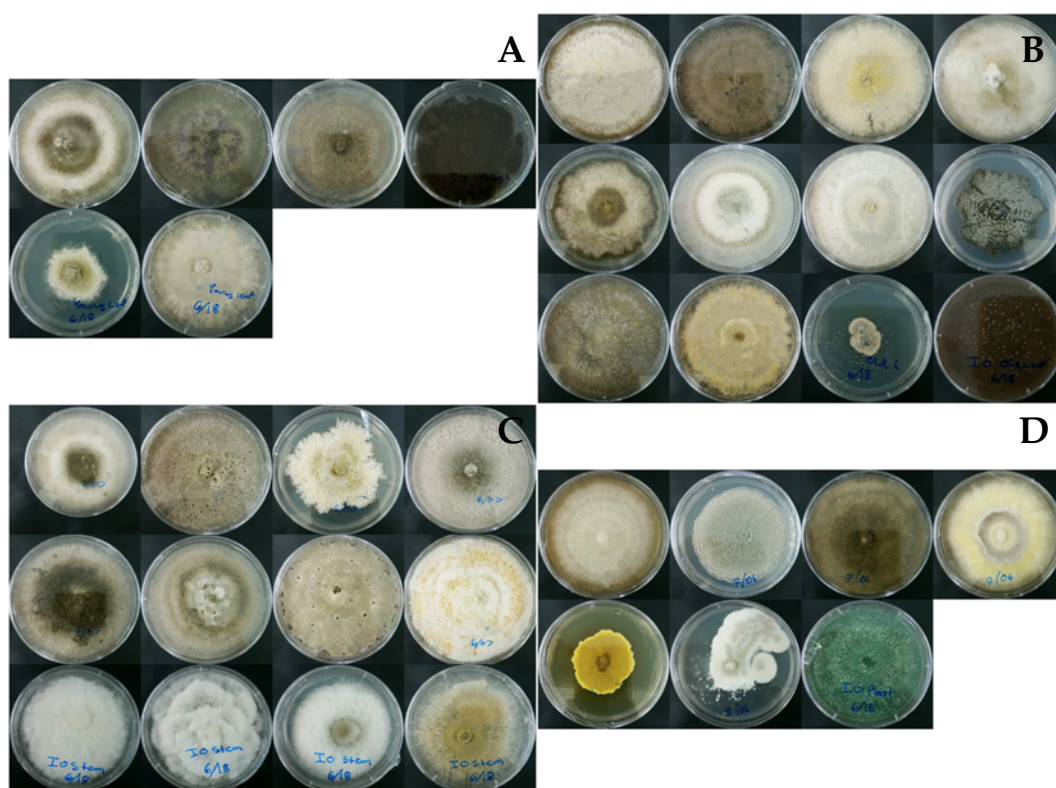

**Supplementary Figure S1.** Representative of fungal strains that were isolated from tea grown in the conventional system including 12 strains from old leaves (A), six strains from young leaves (B), seven strains from root (C) and 12 strains from stem (D). All fungal strains were cultivated on PDA media for 7 days at 28°C.

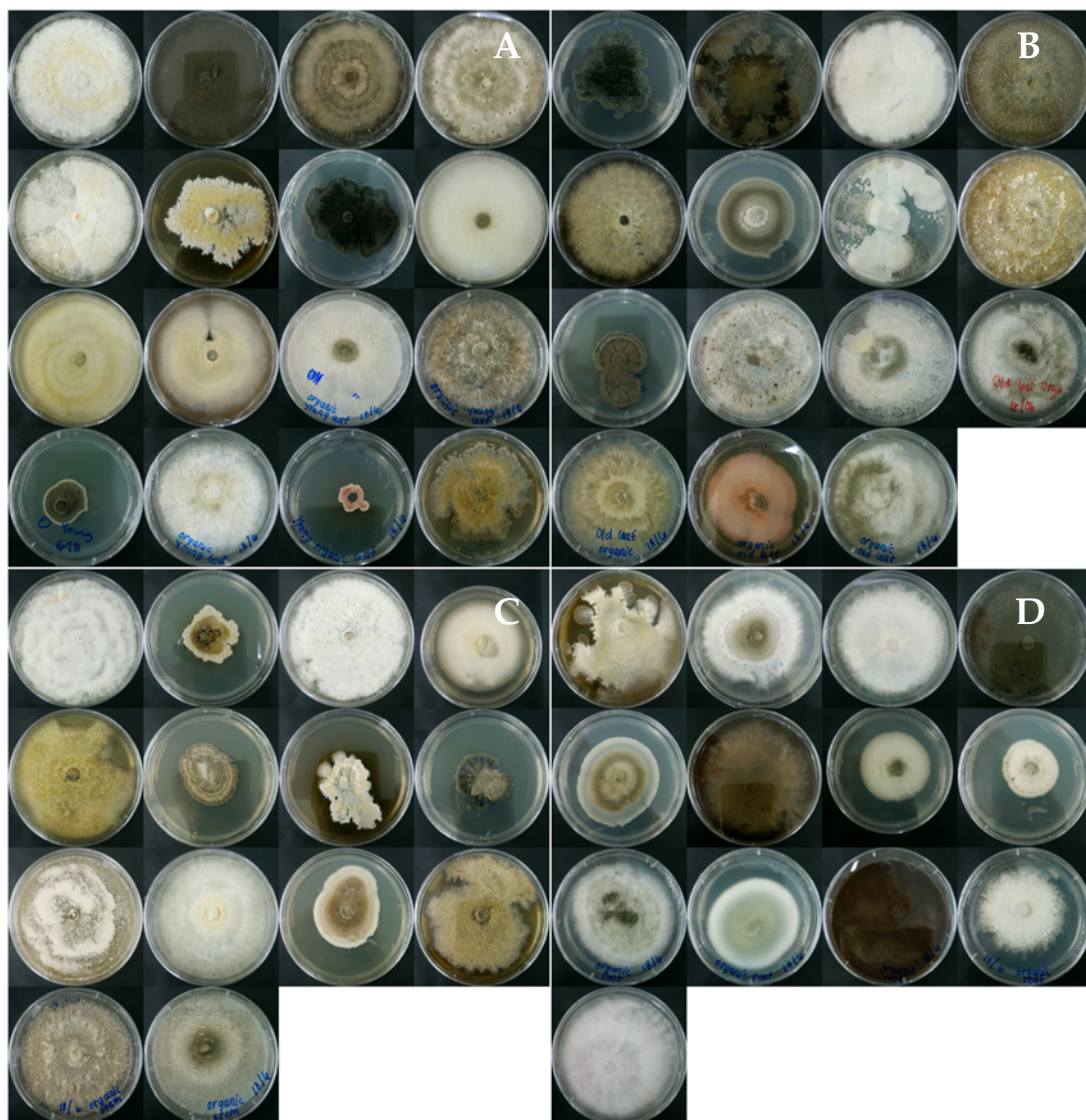

**Supplementary Figure S2.** Representative of fungal strains that were isolated from tea grown in the organic system including 16 strains from young leaves (A), 15 strains from old leaves (B), 14 strains from stem (C), and 13 strains from root (D). All fungal strains were cultivated on PDA media for 7 days at 28° C.

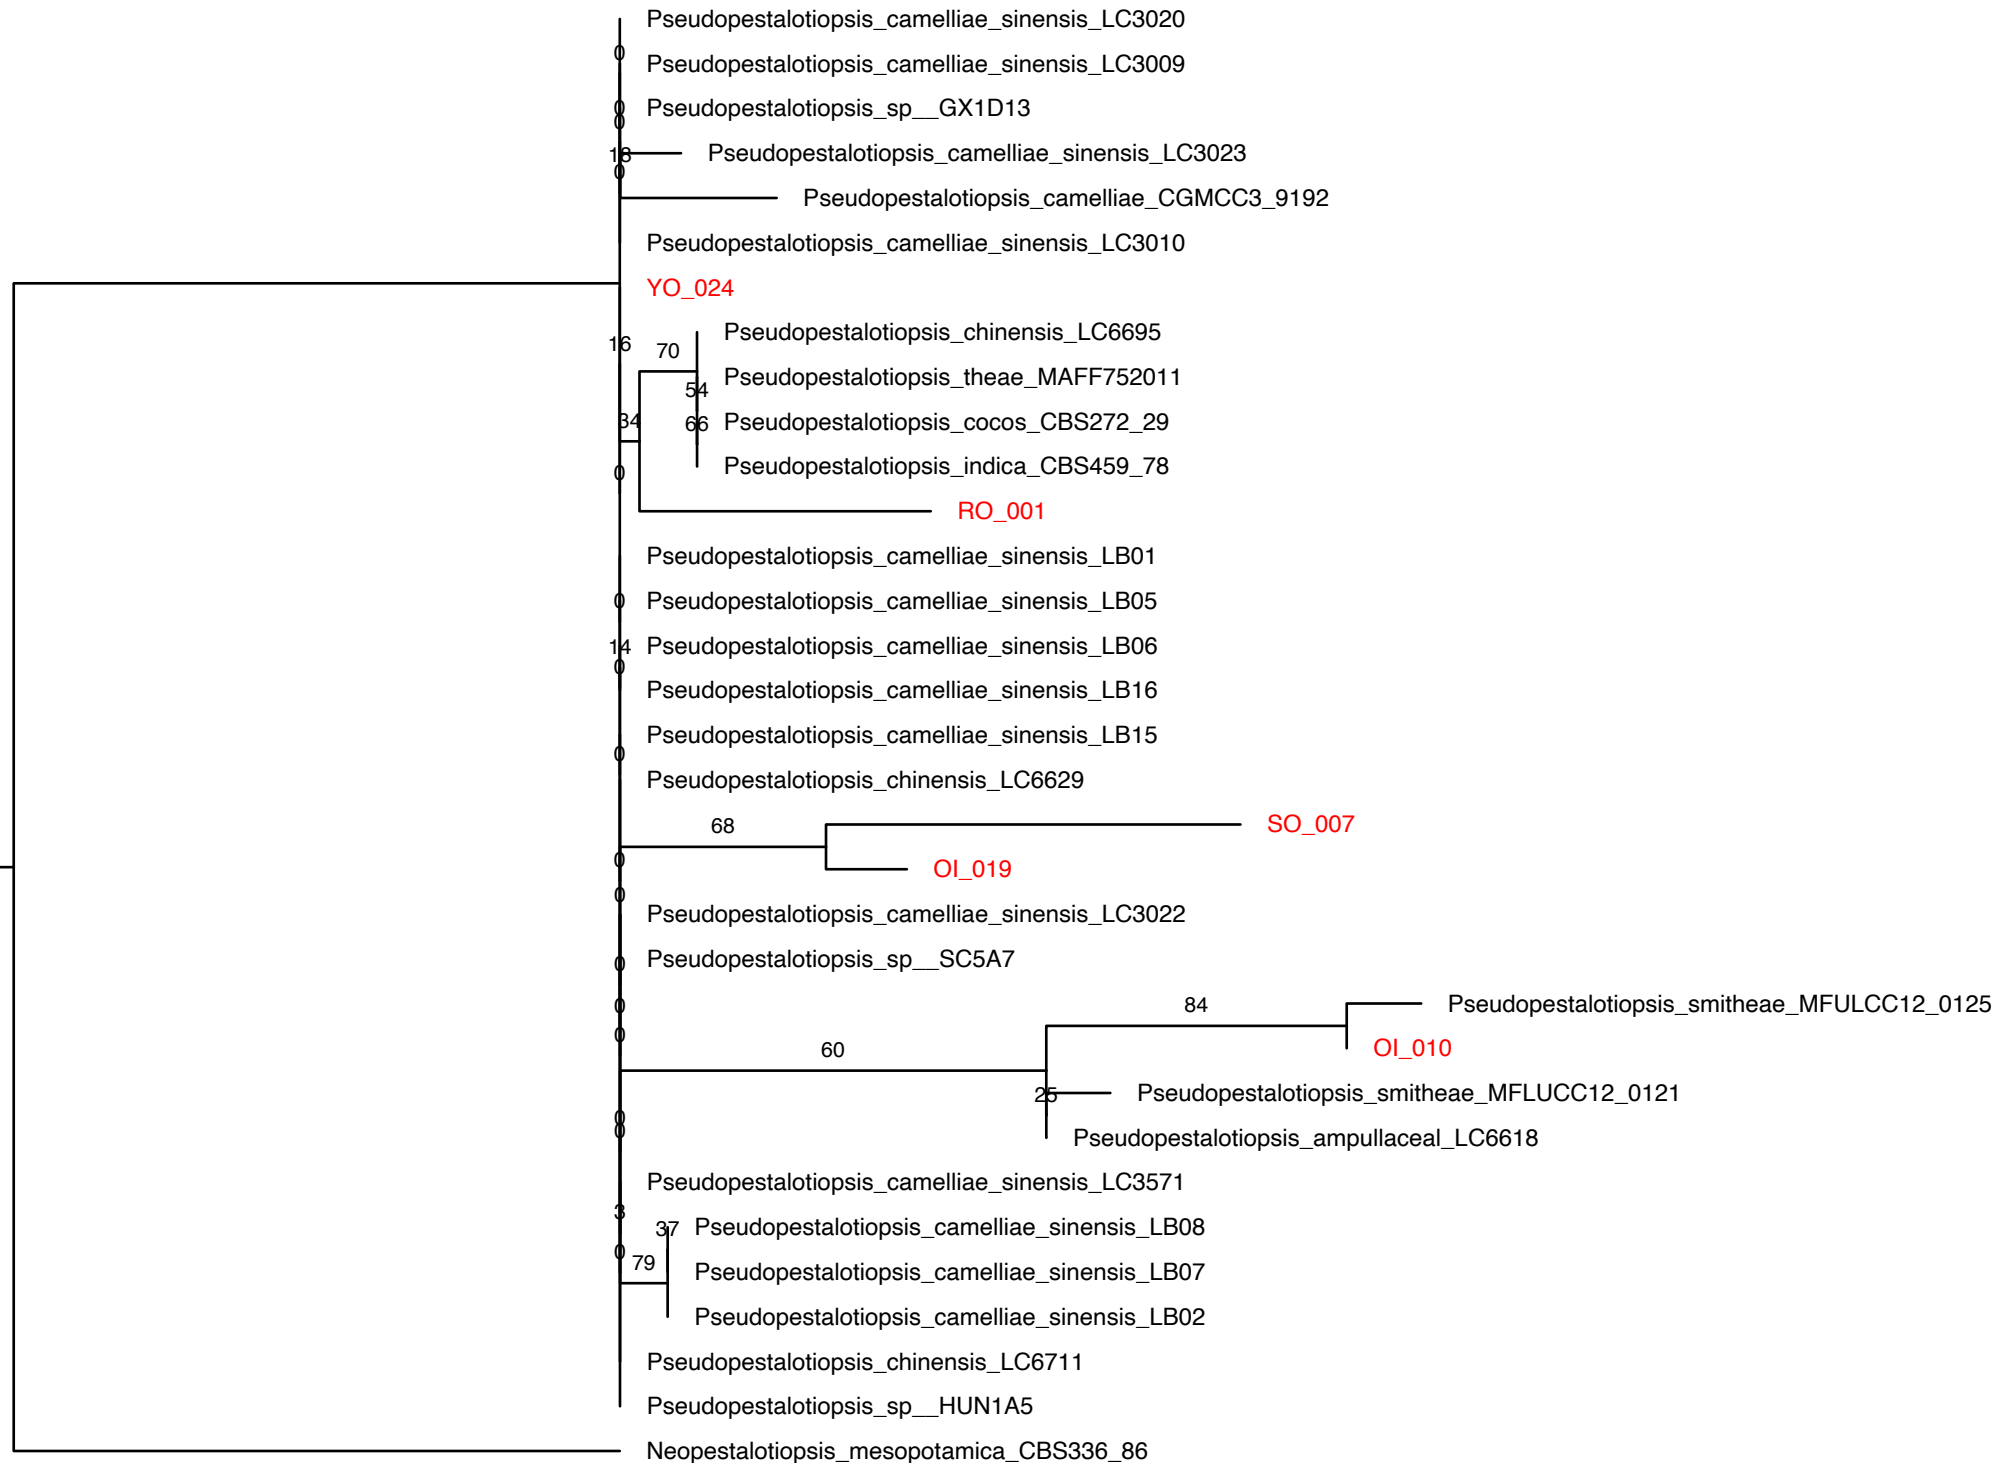

0.006

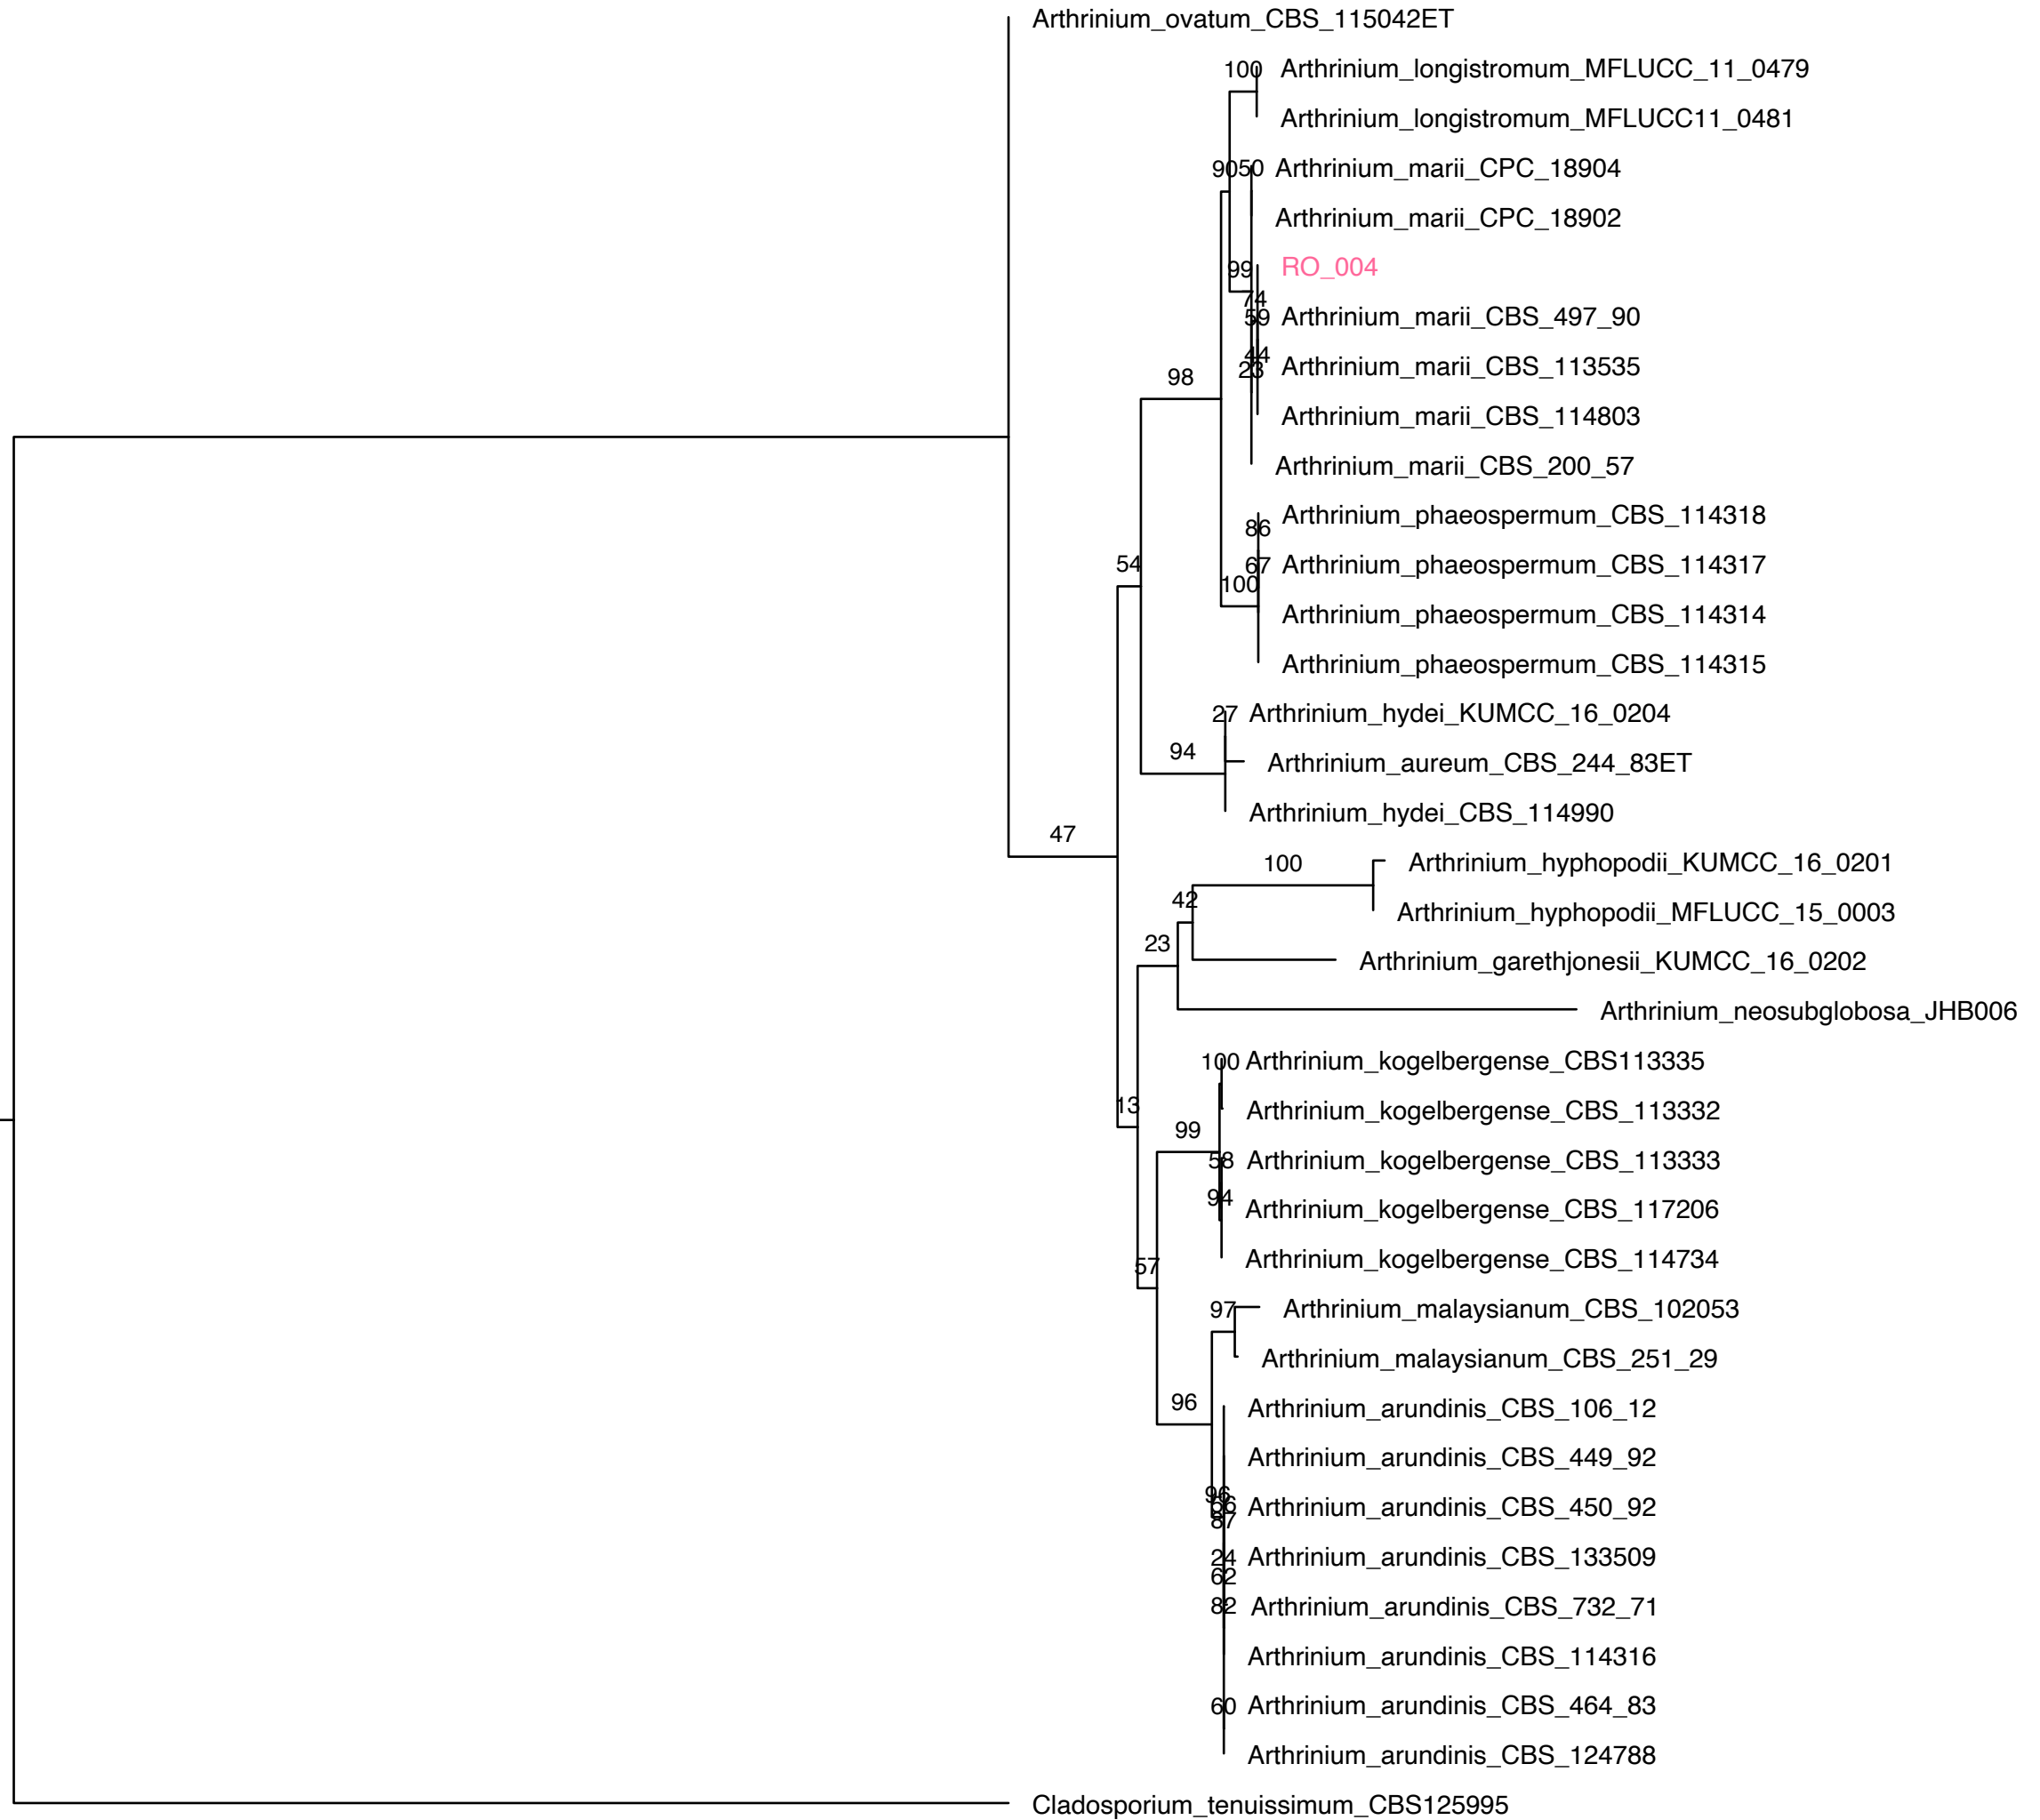

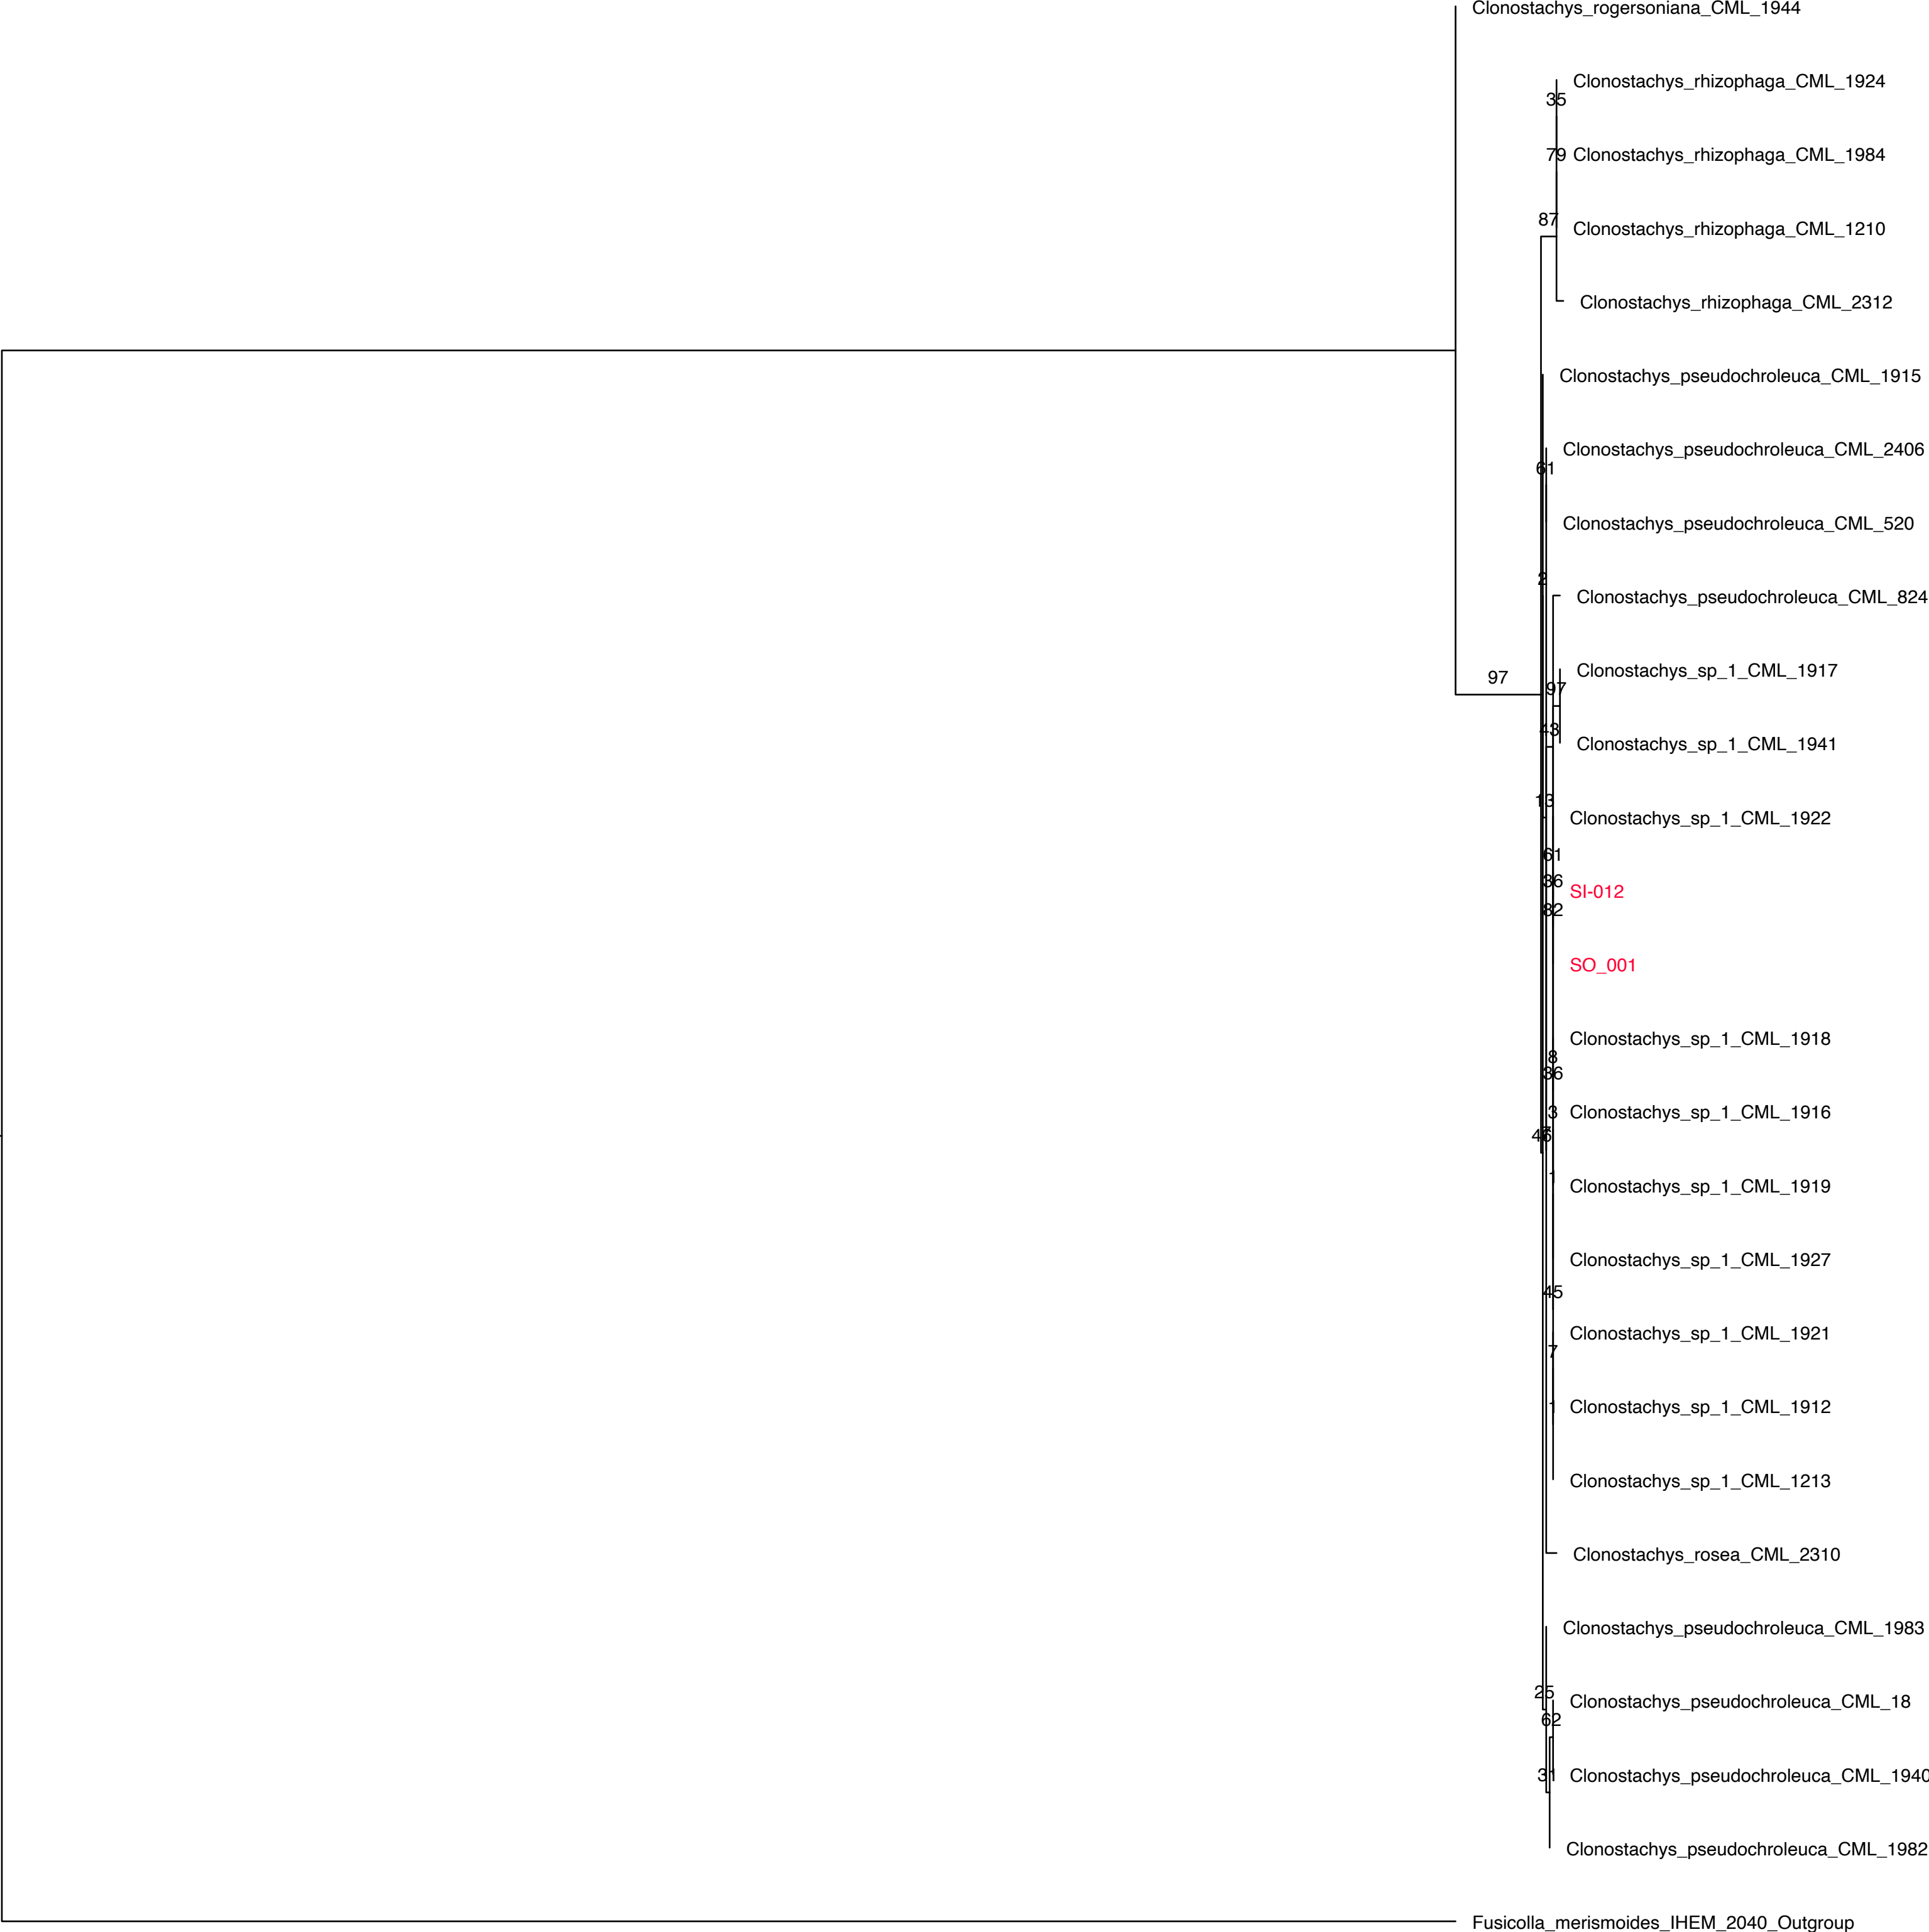

0.05

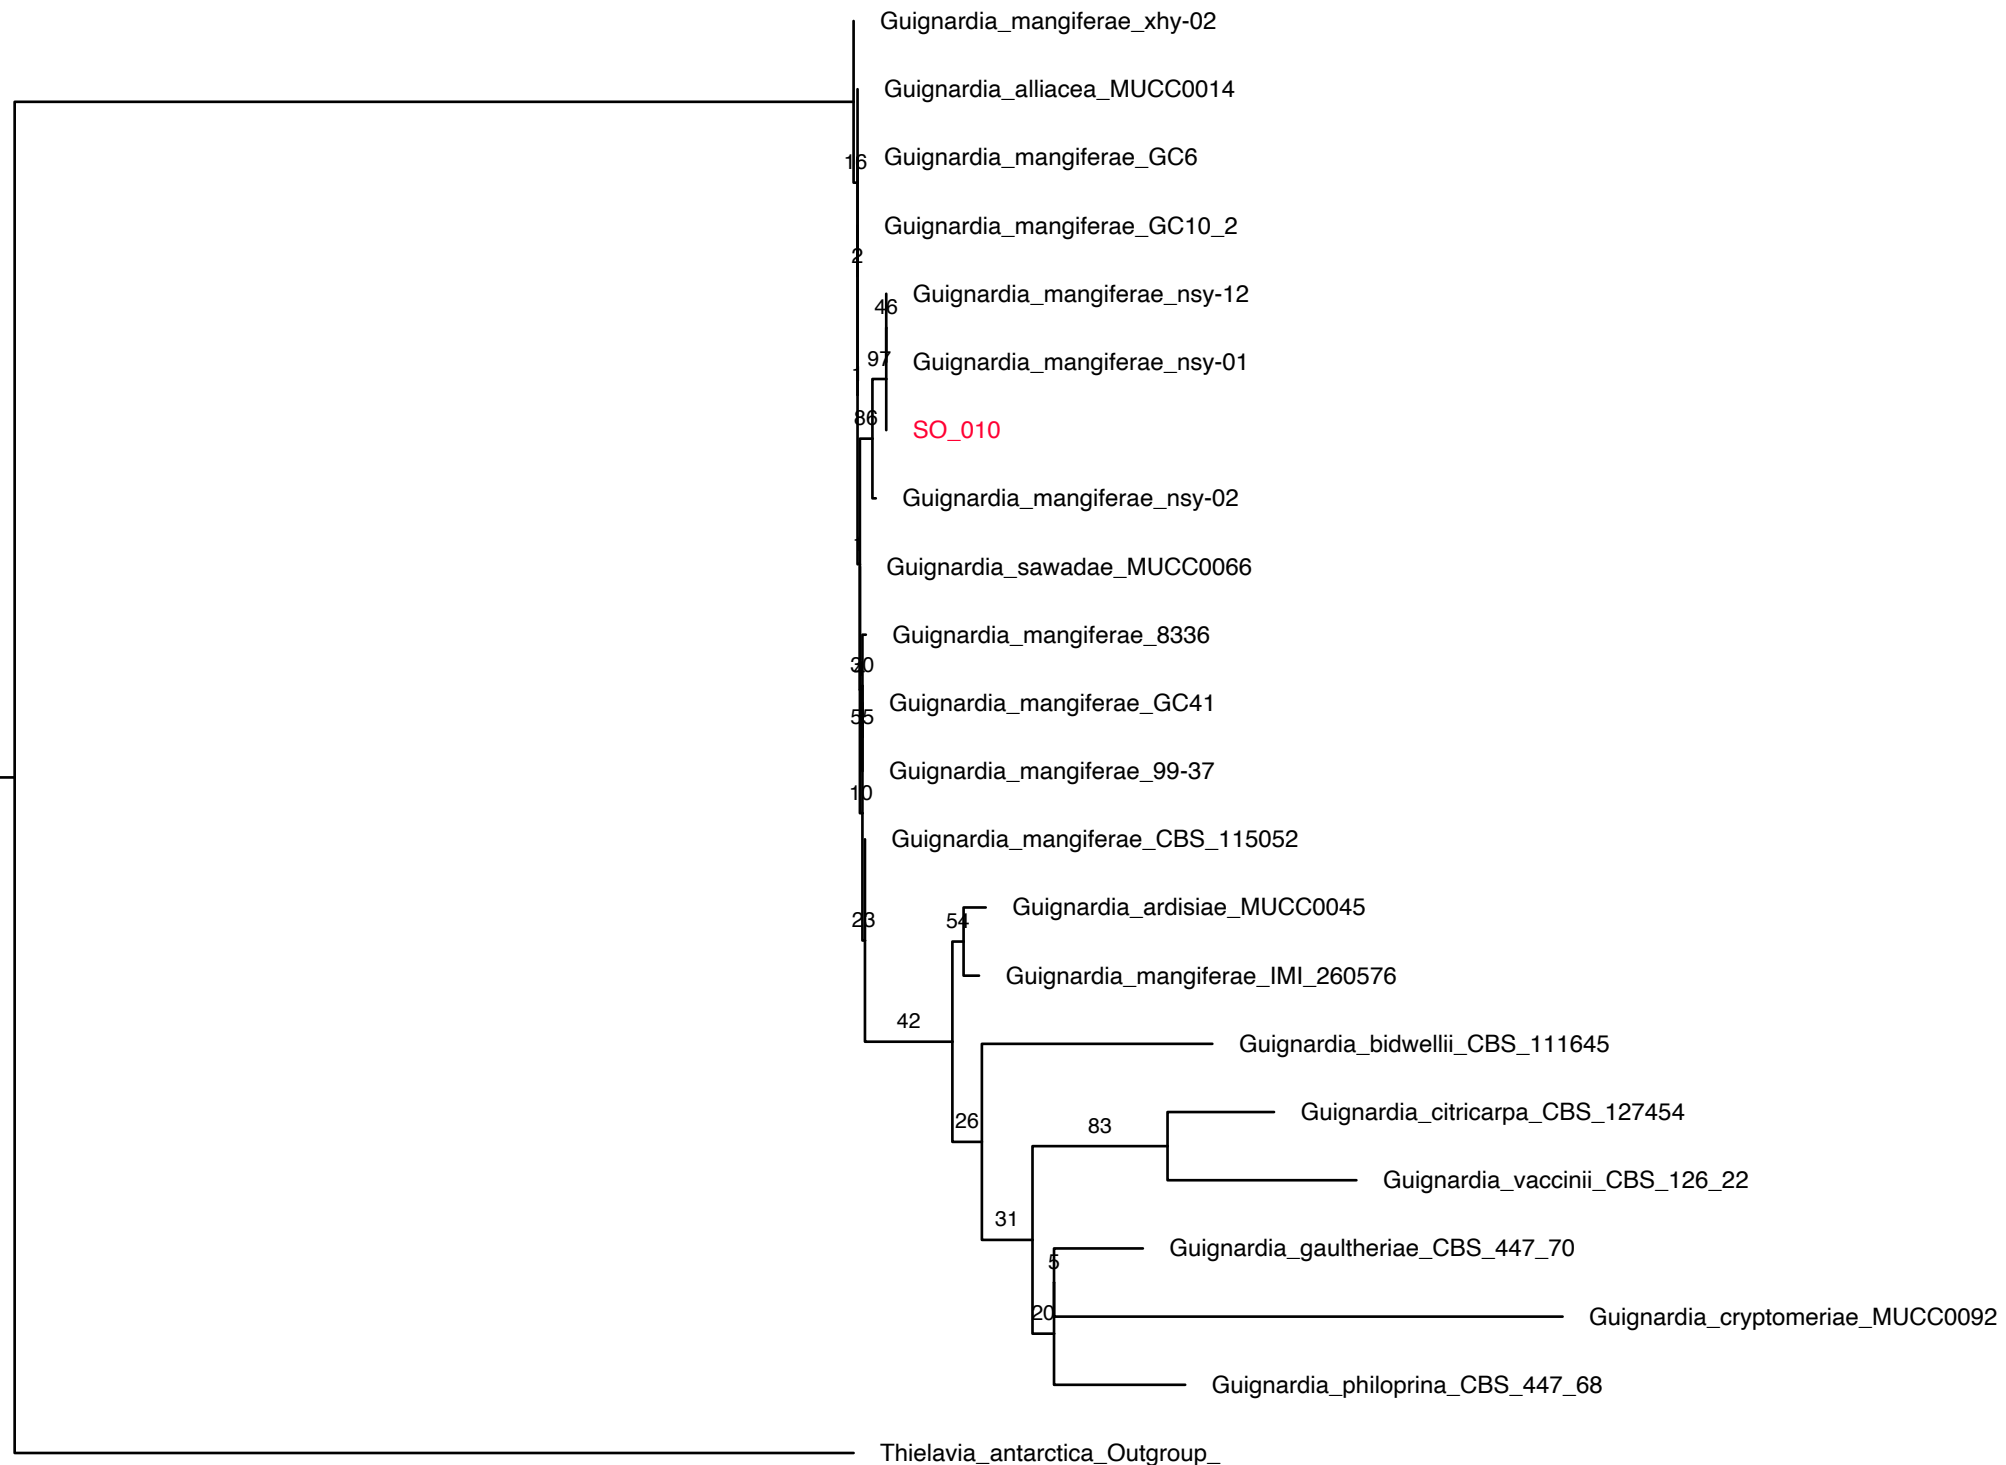

0.07



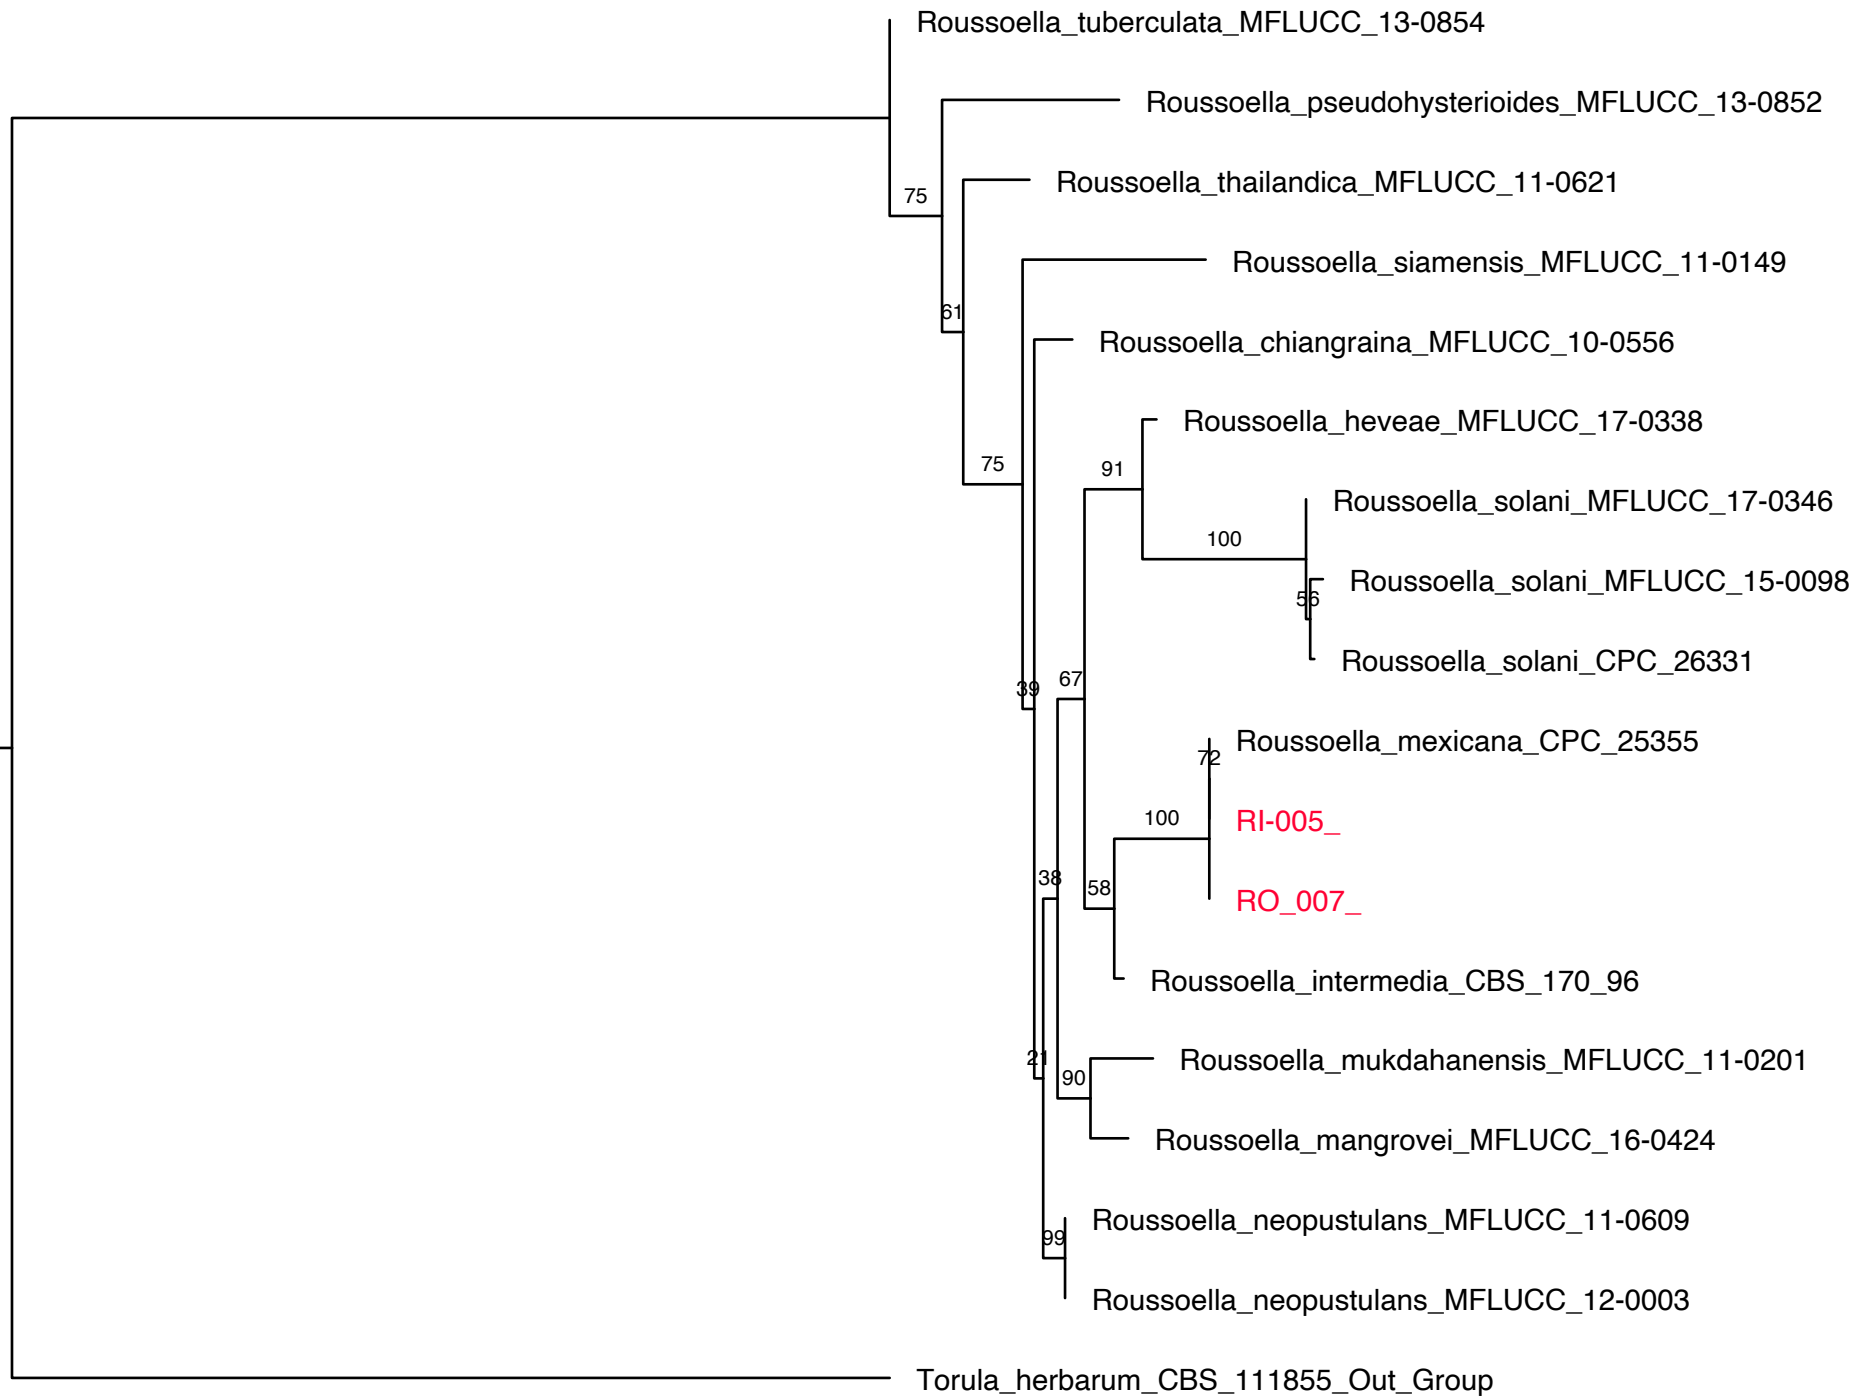

0.09

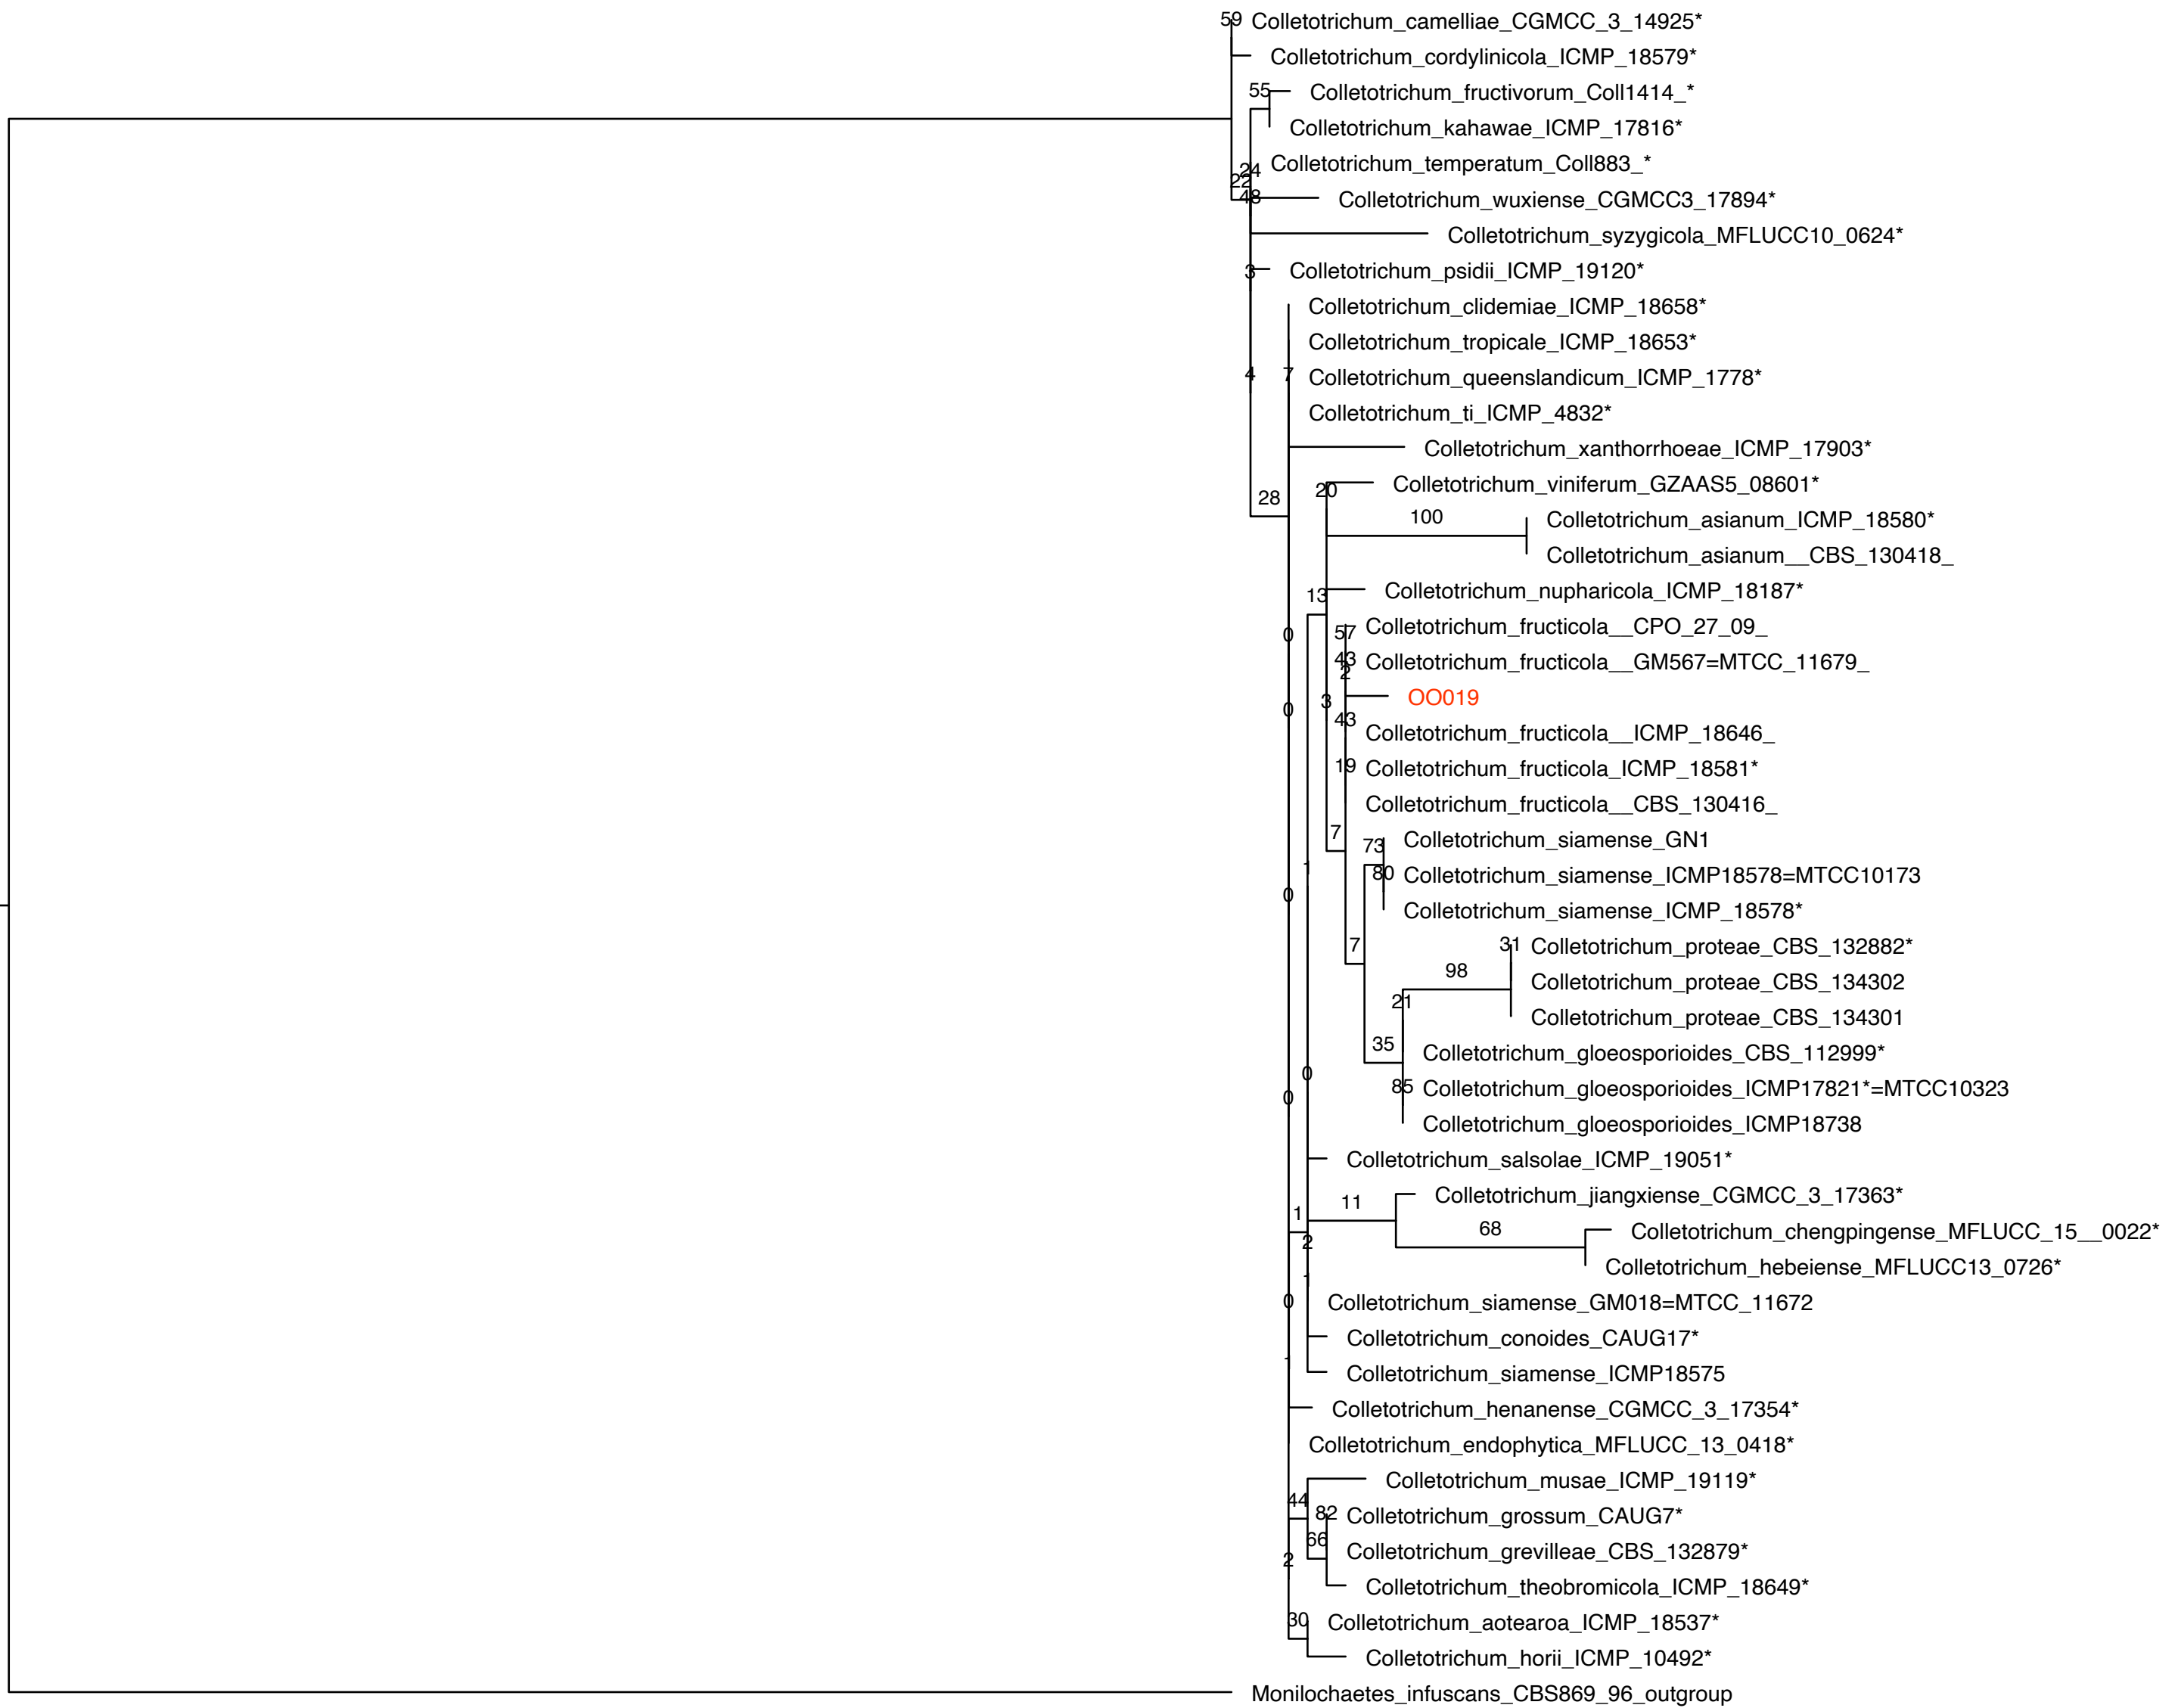

0.02



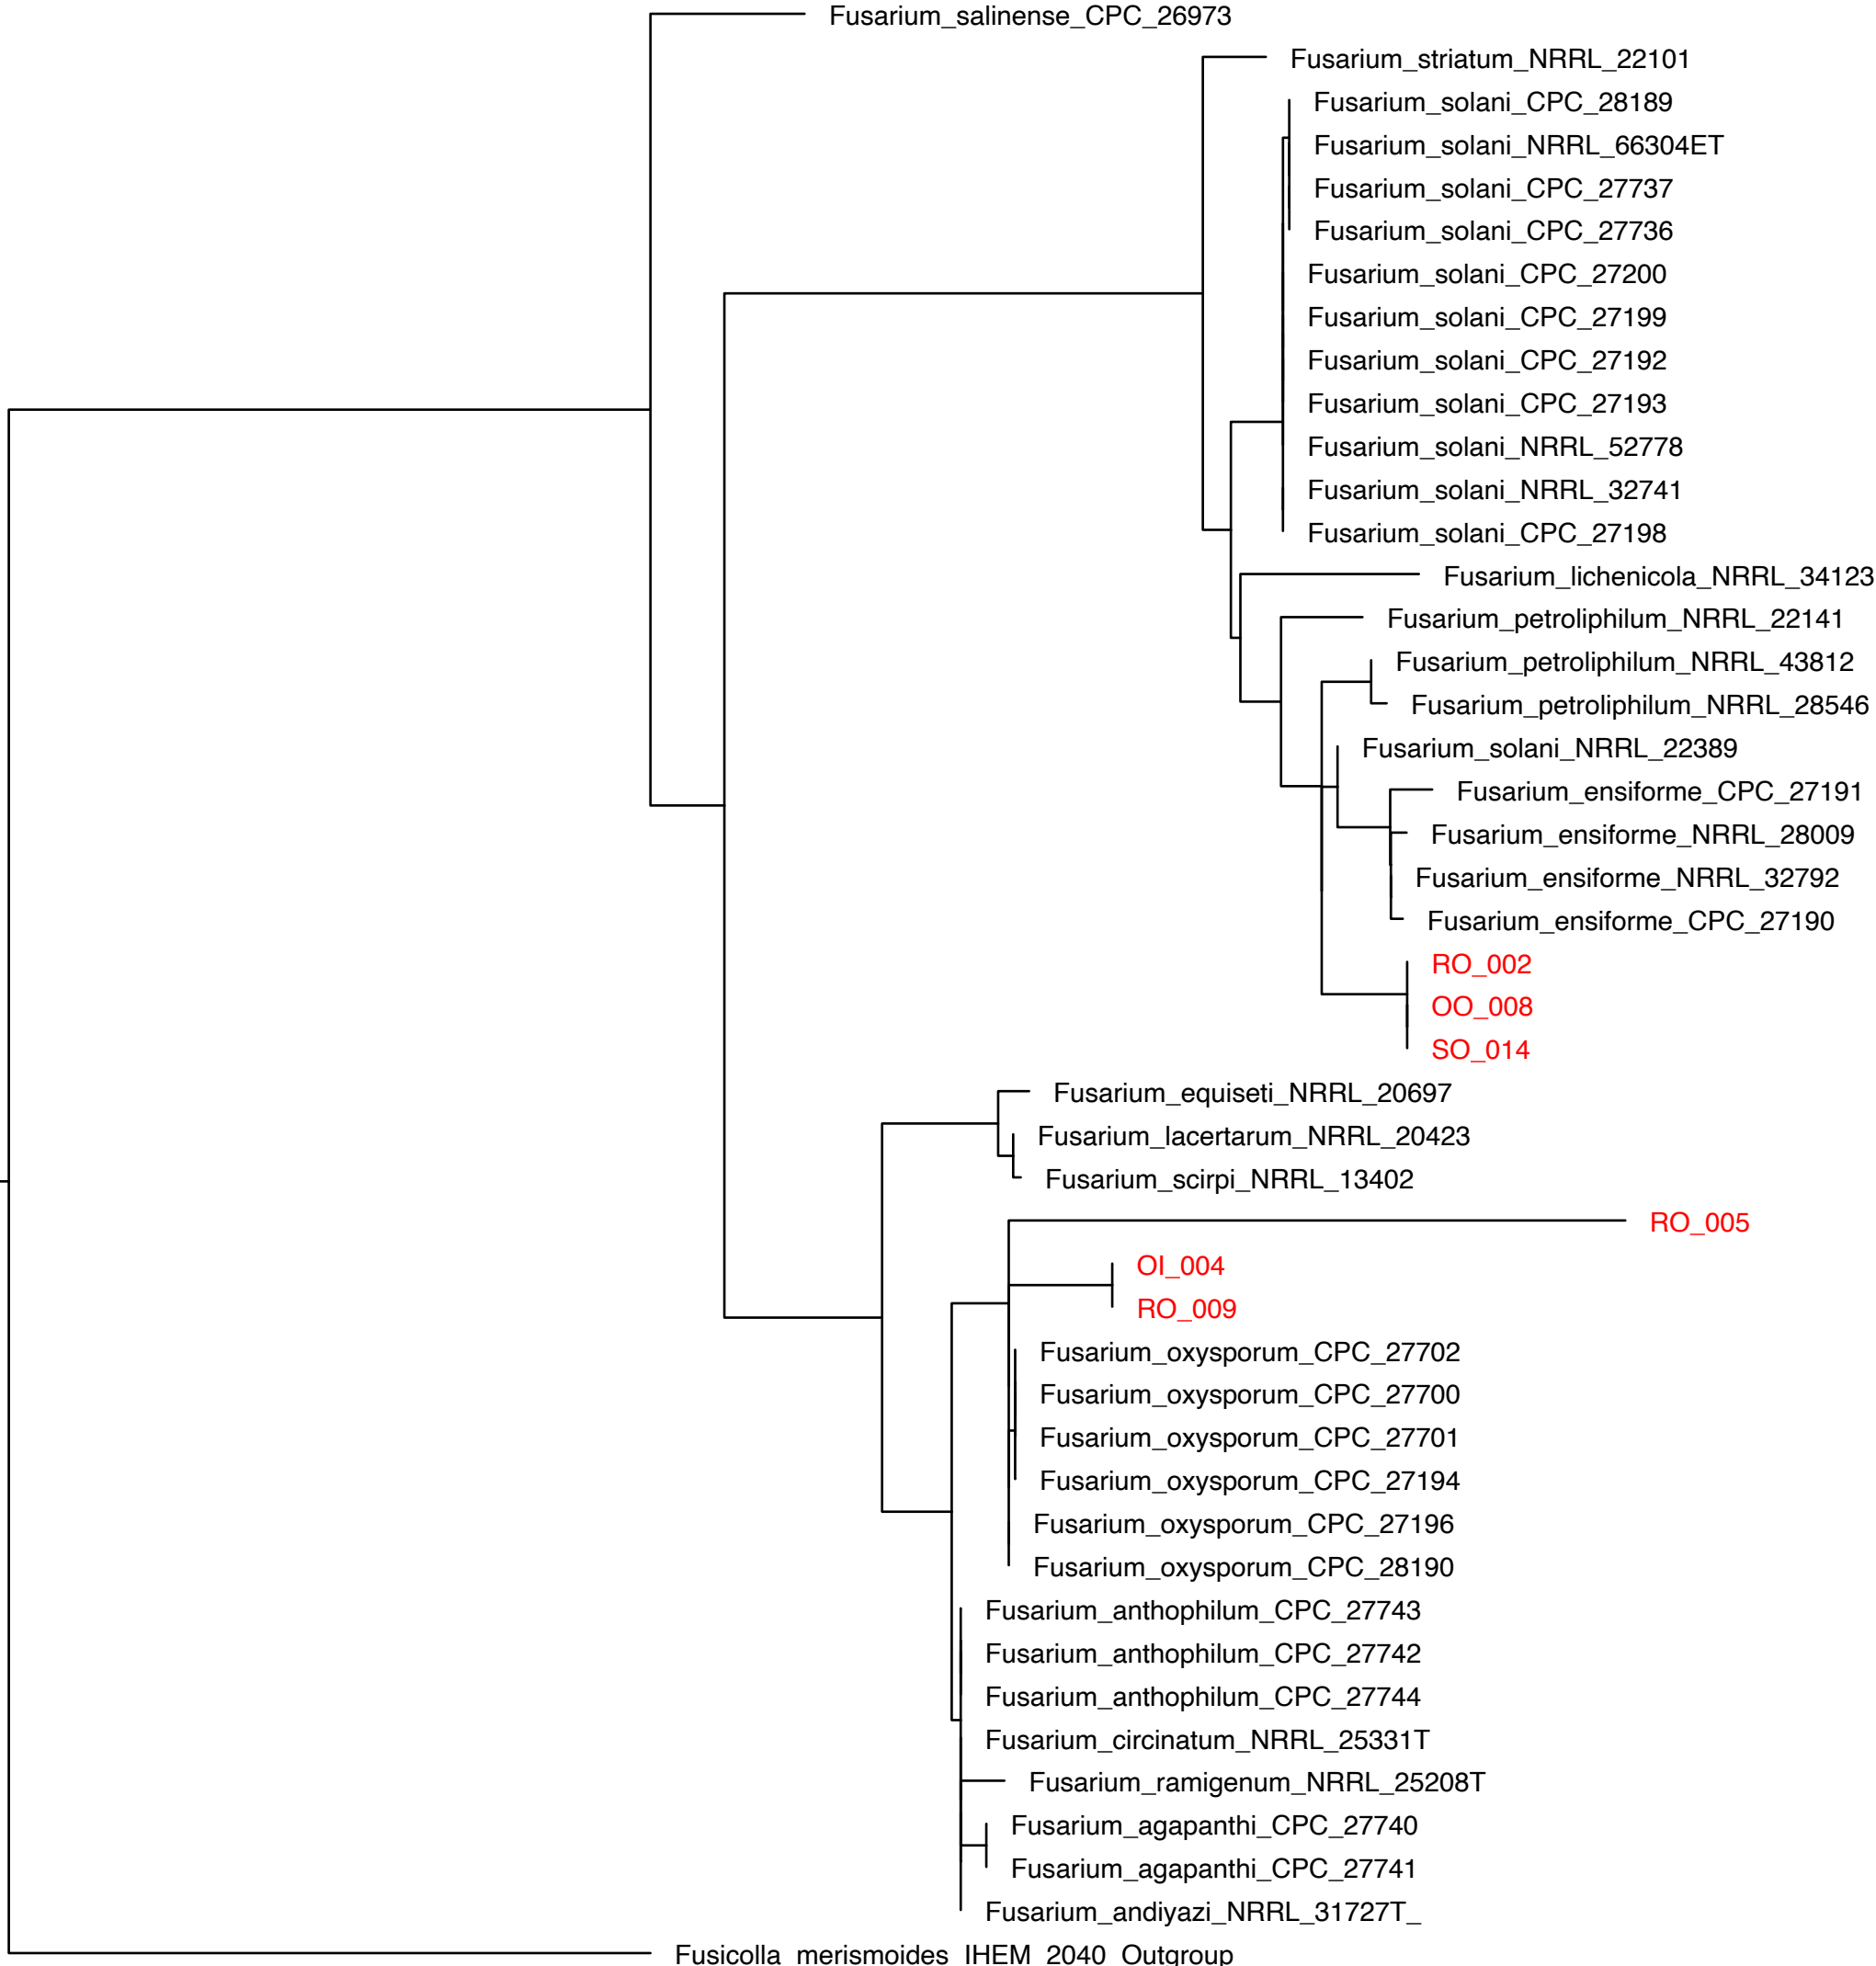

0.02

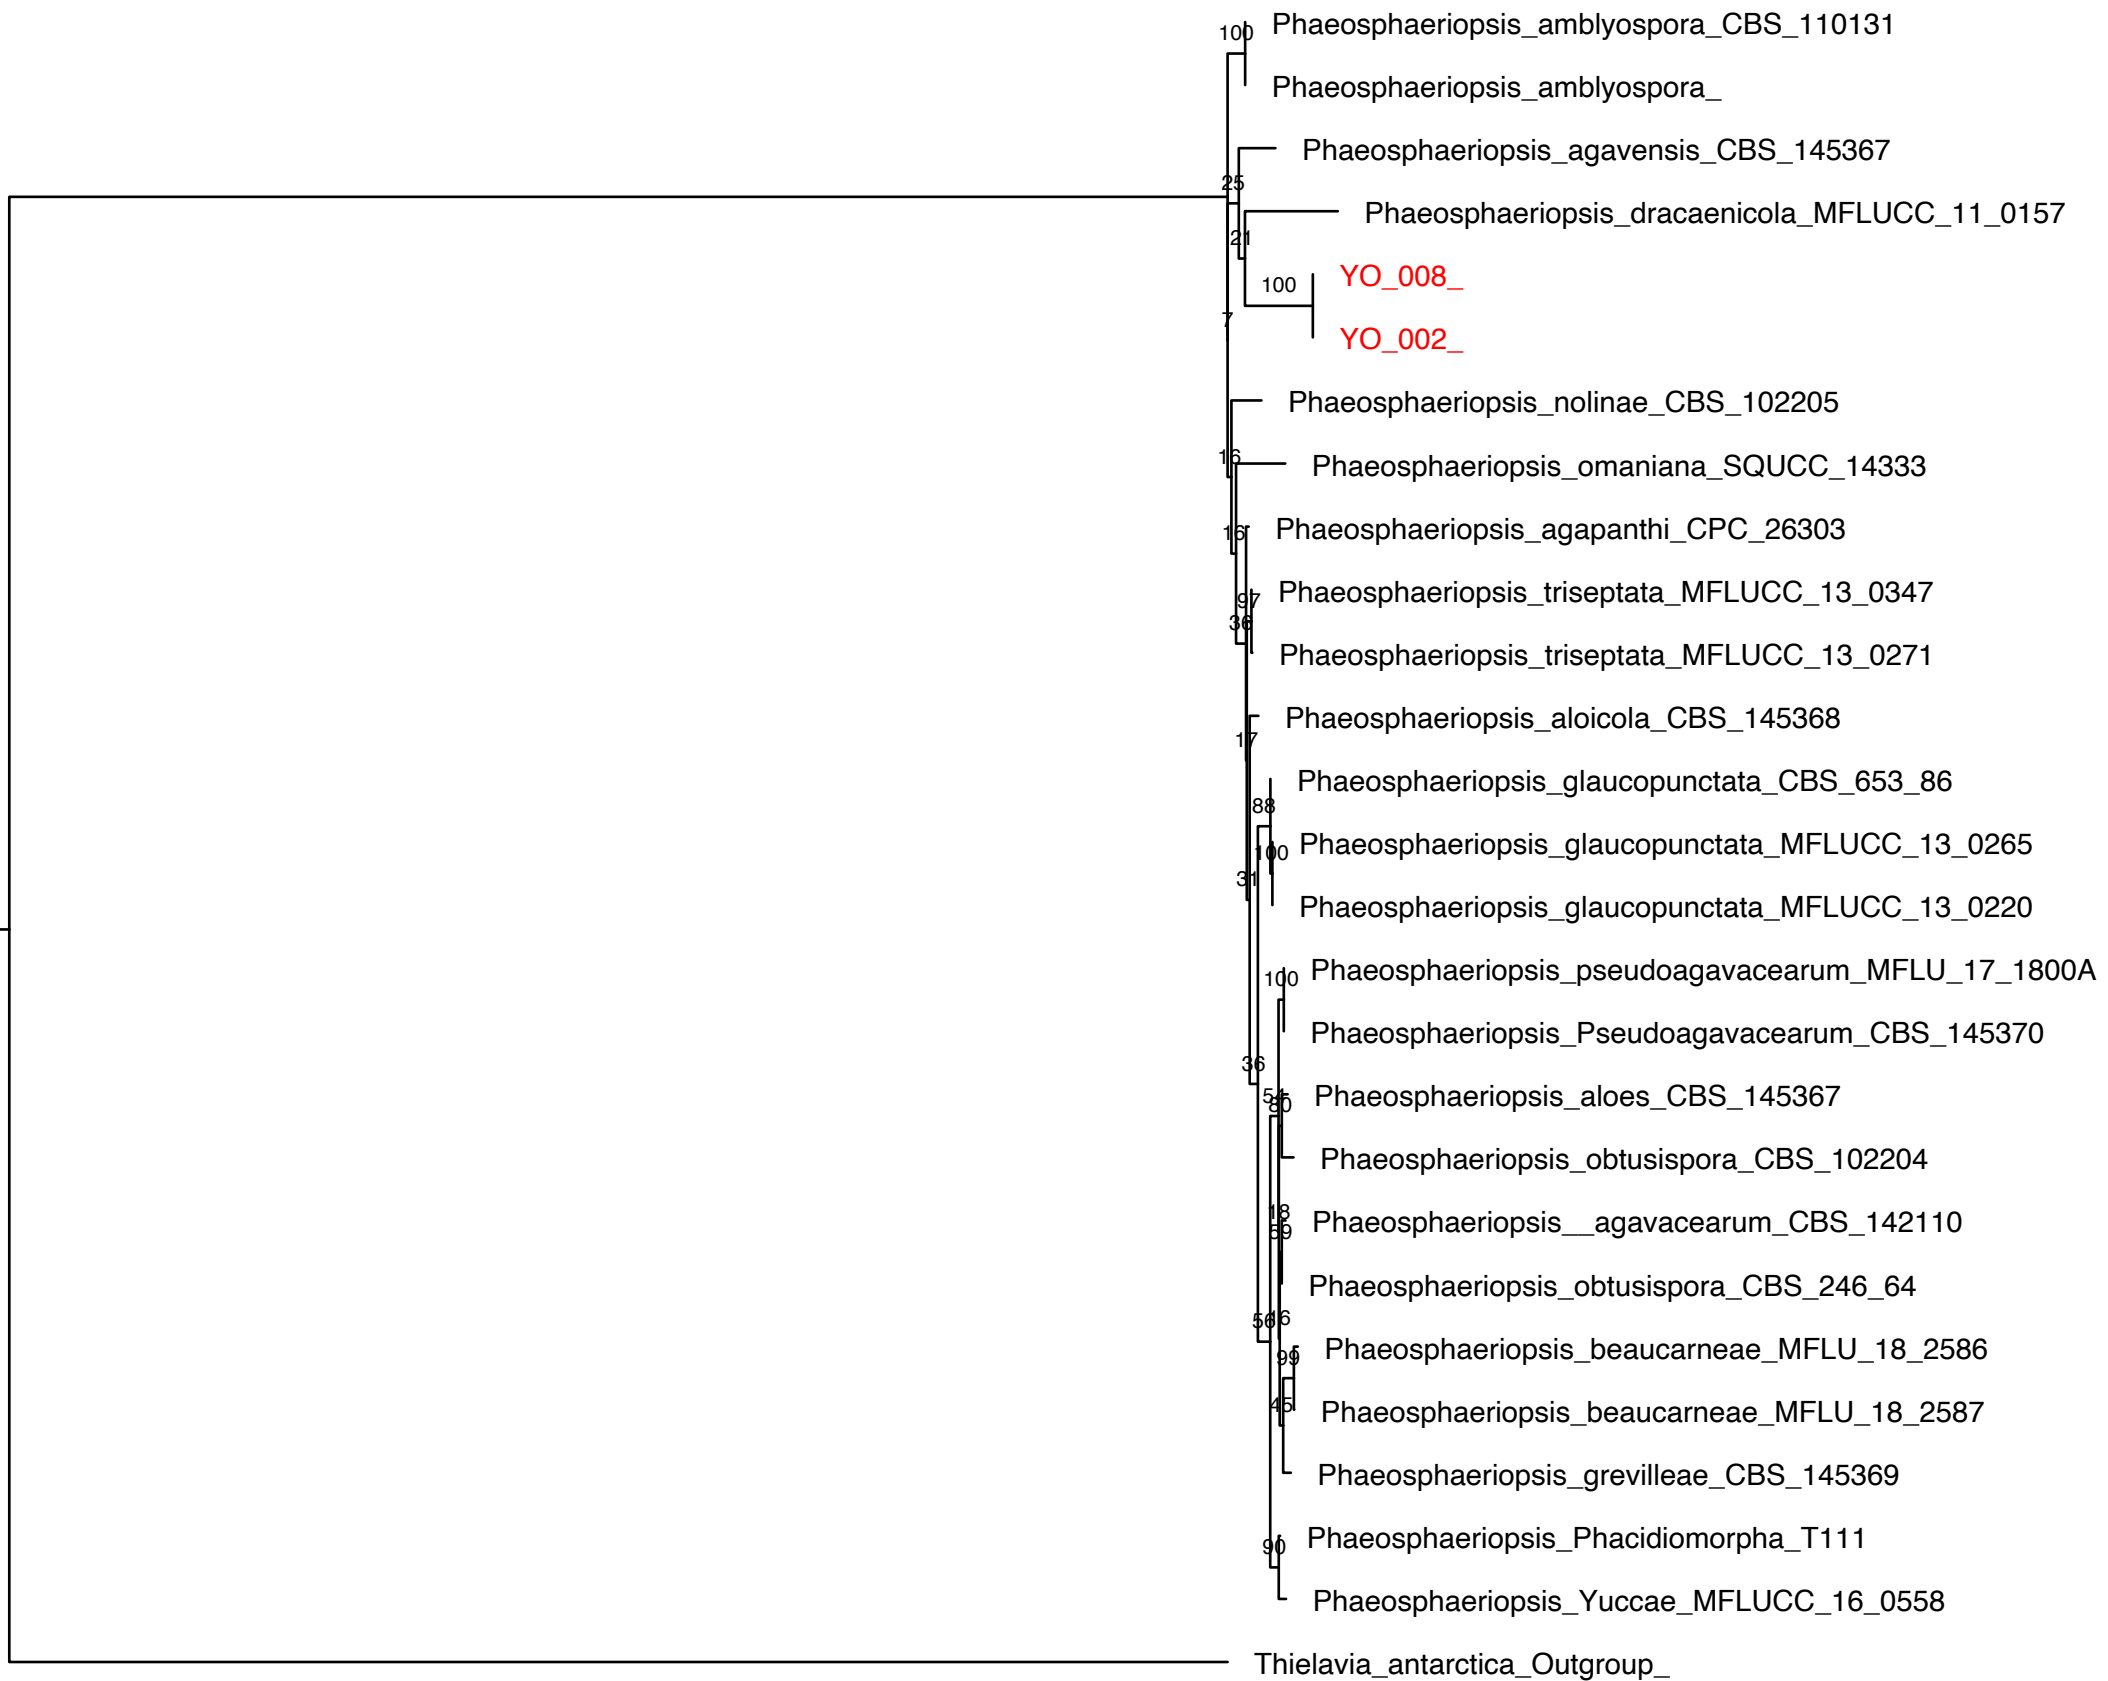

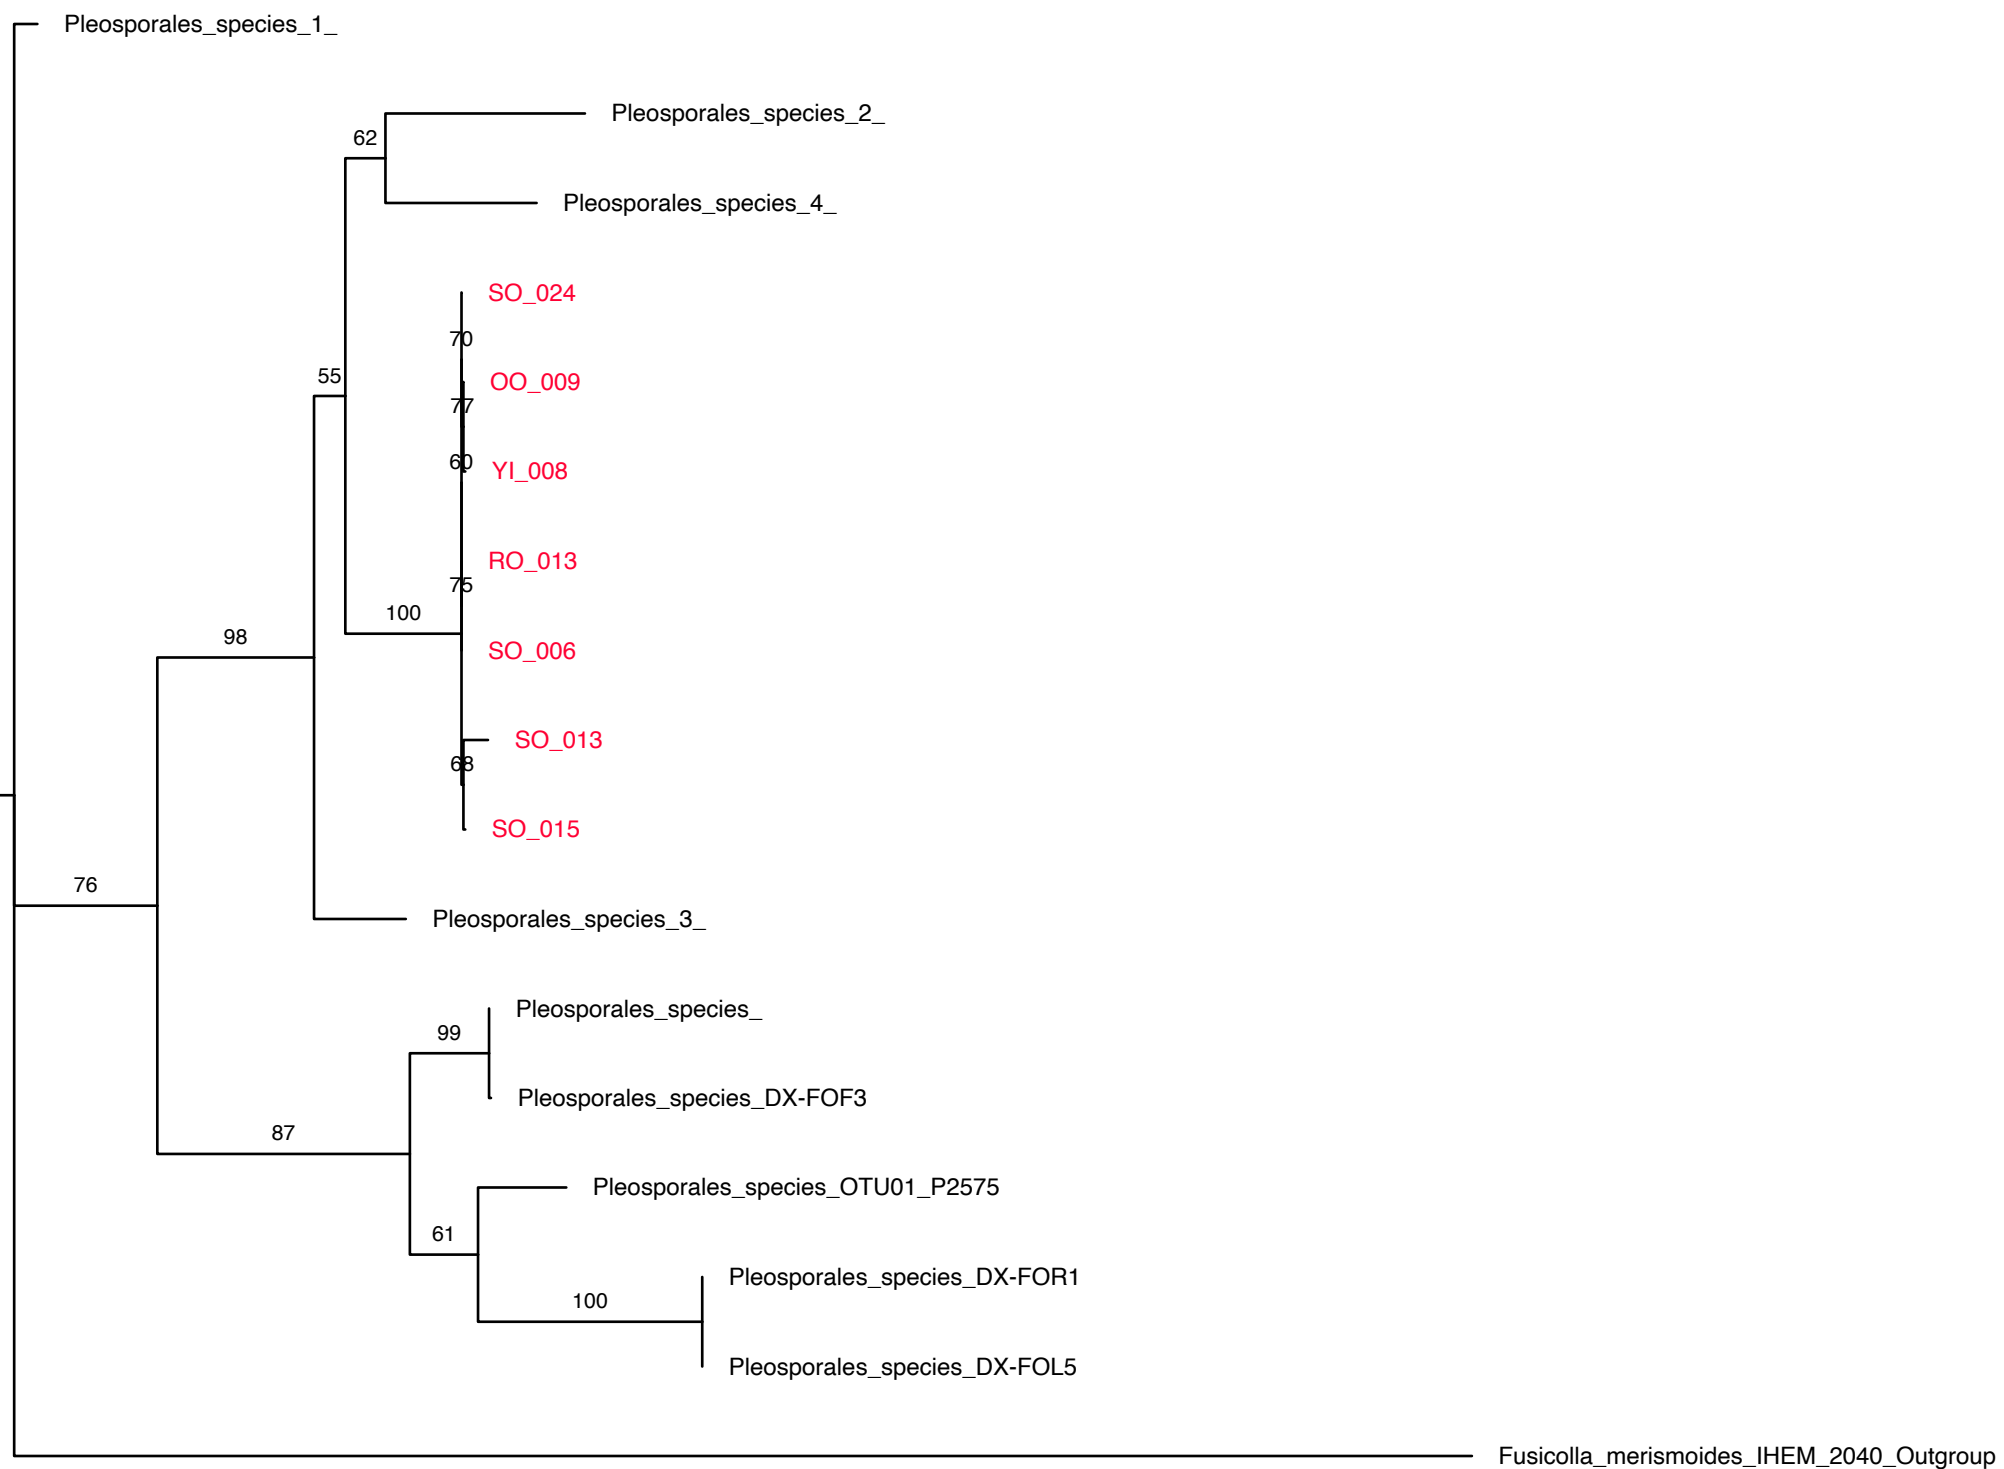

0.2

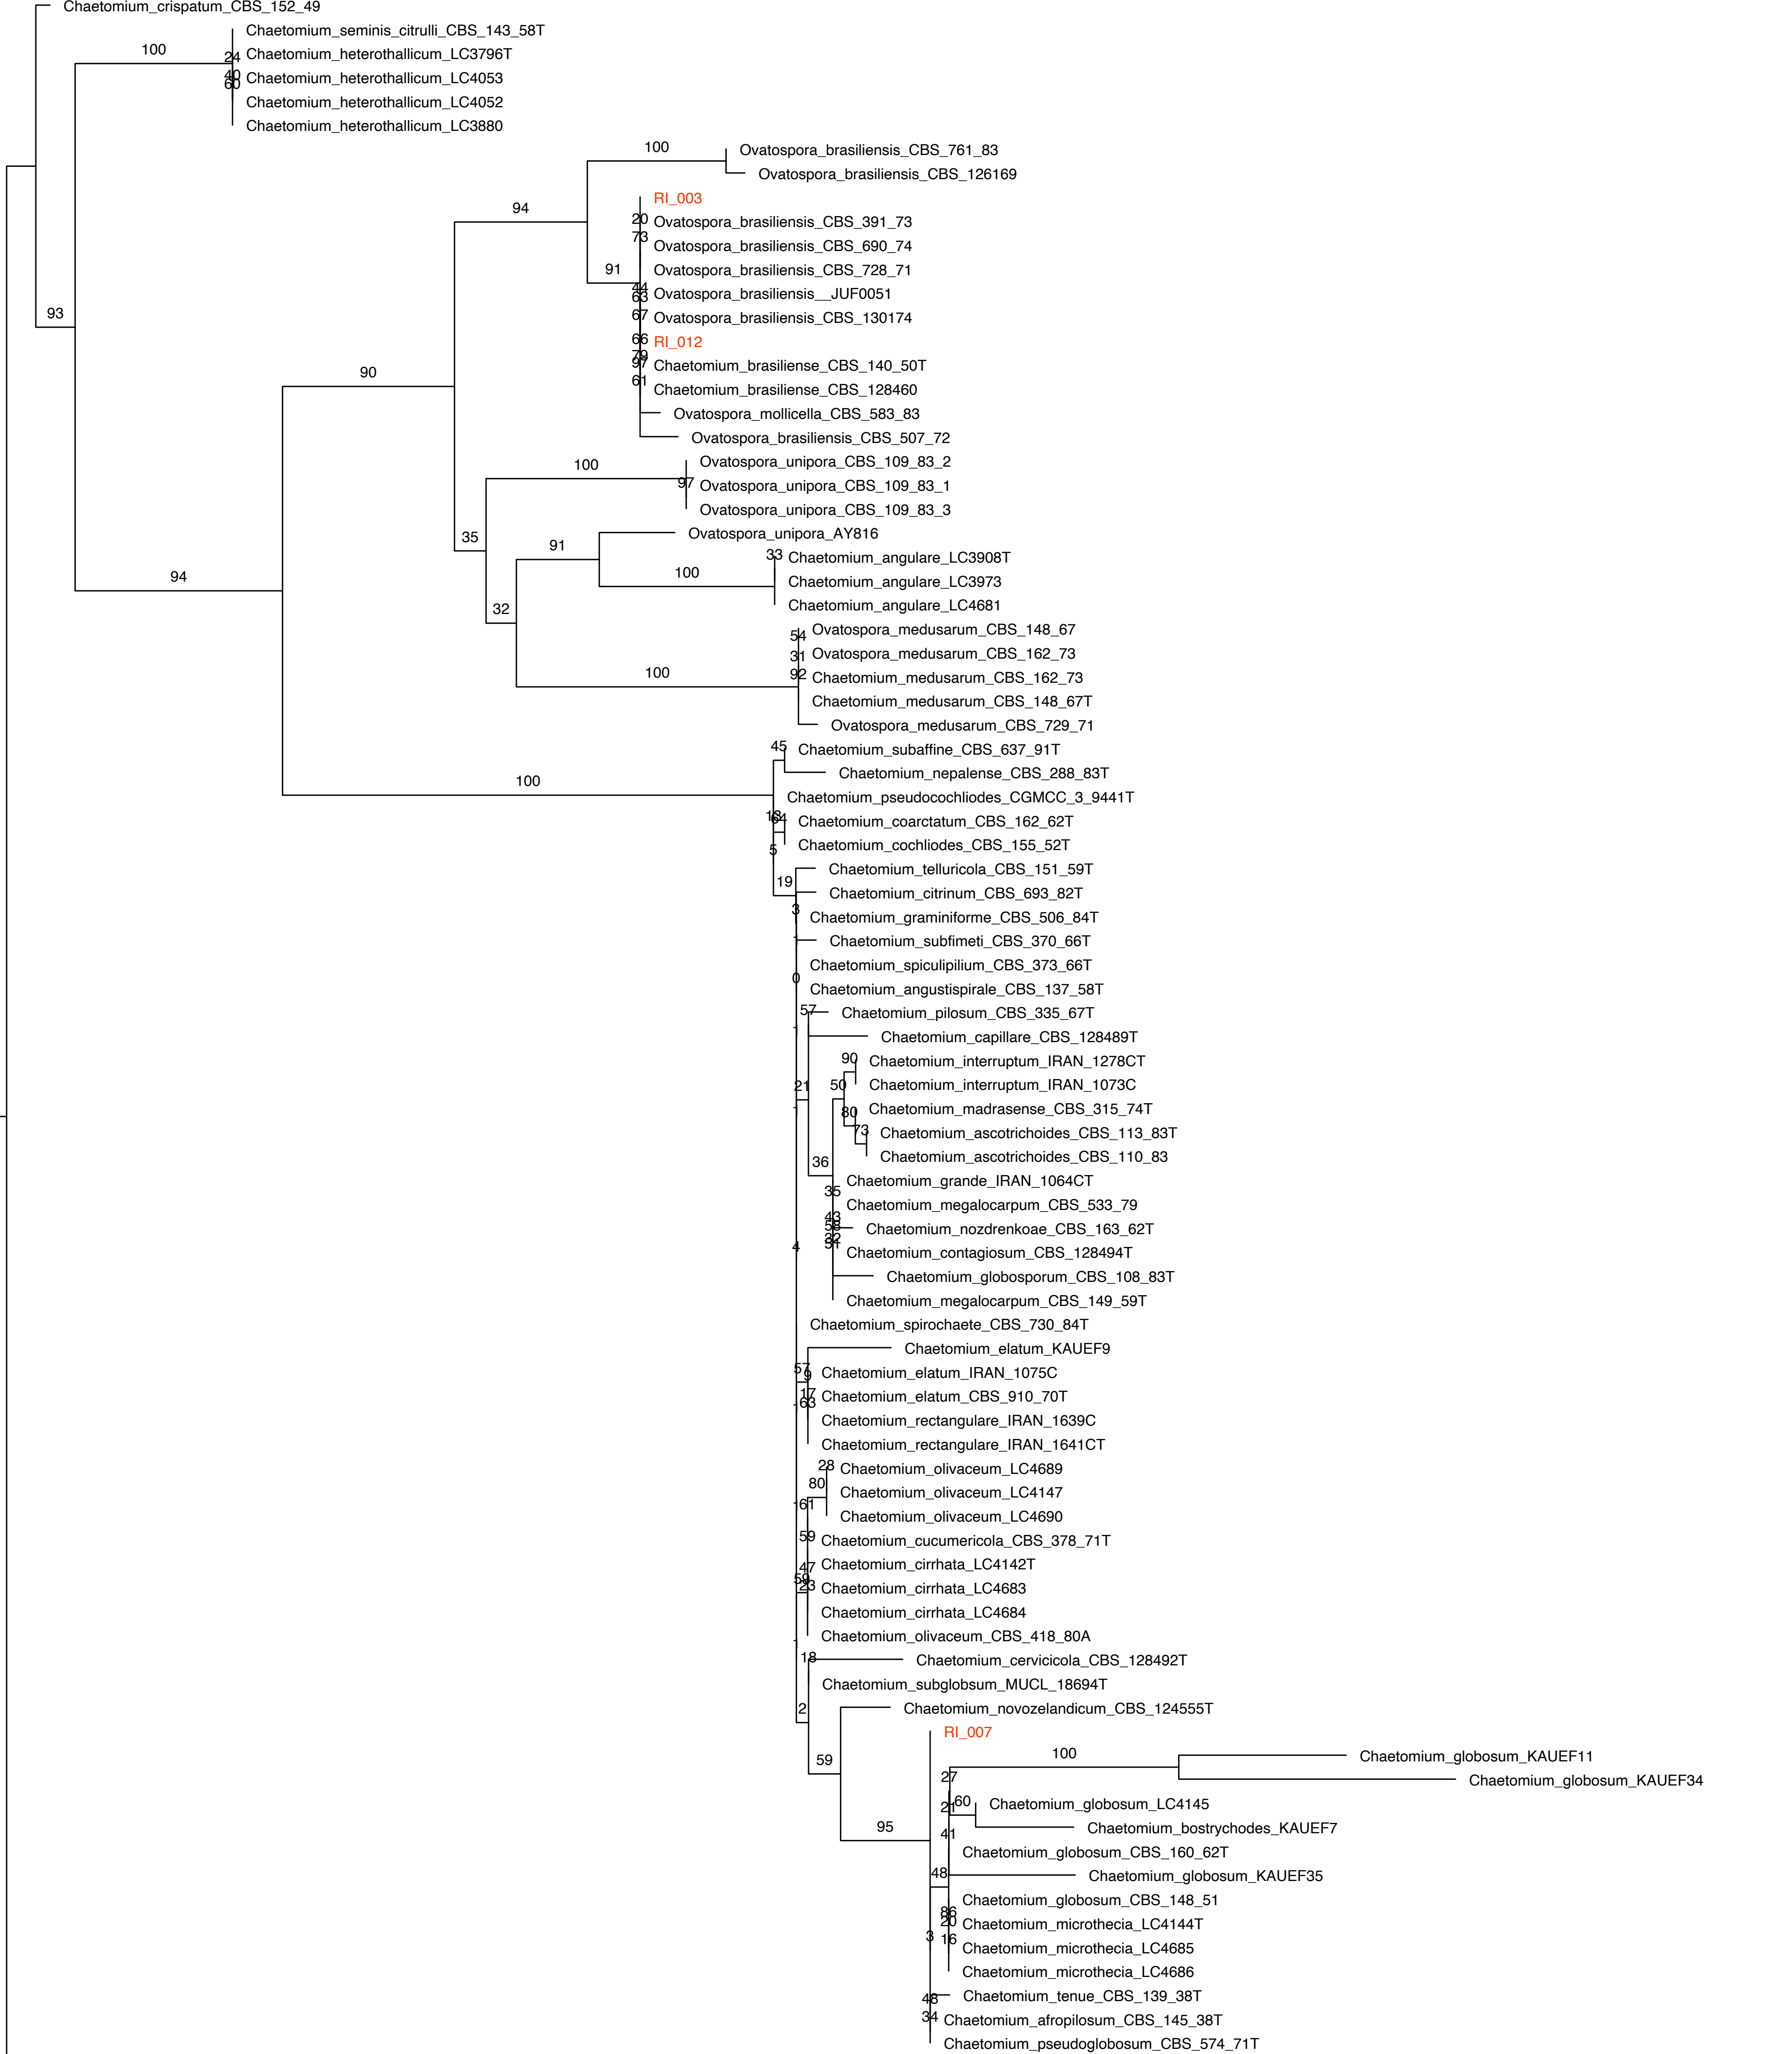

0.02

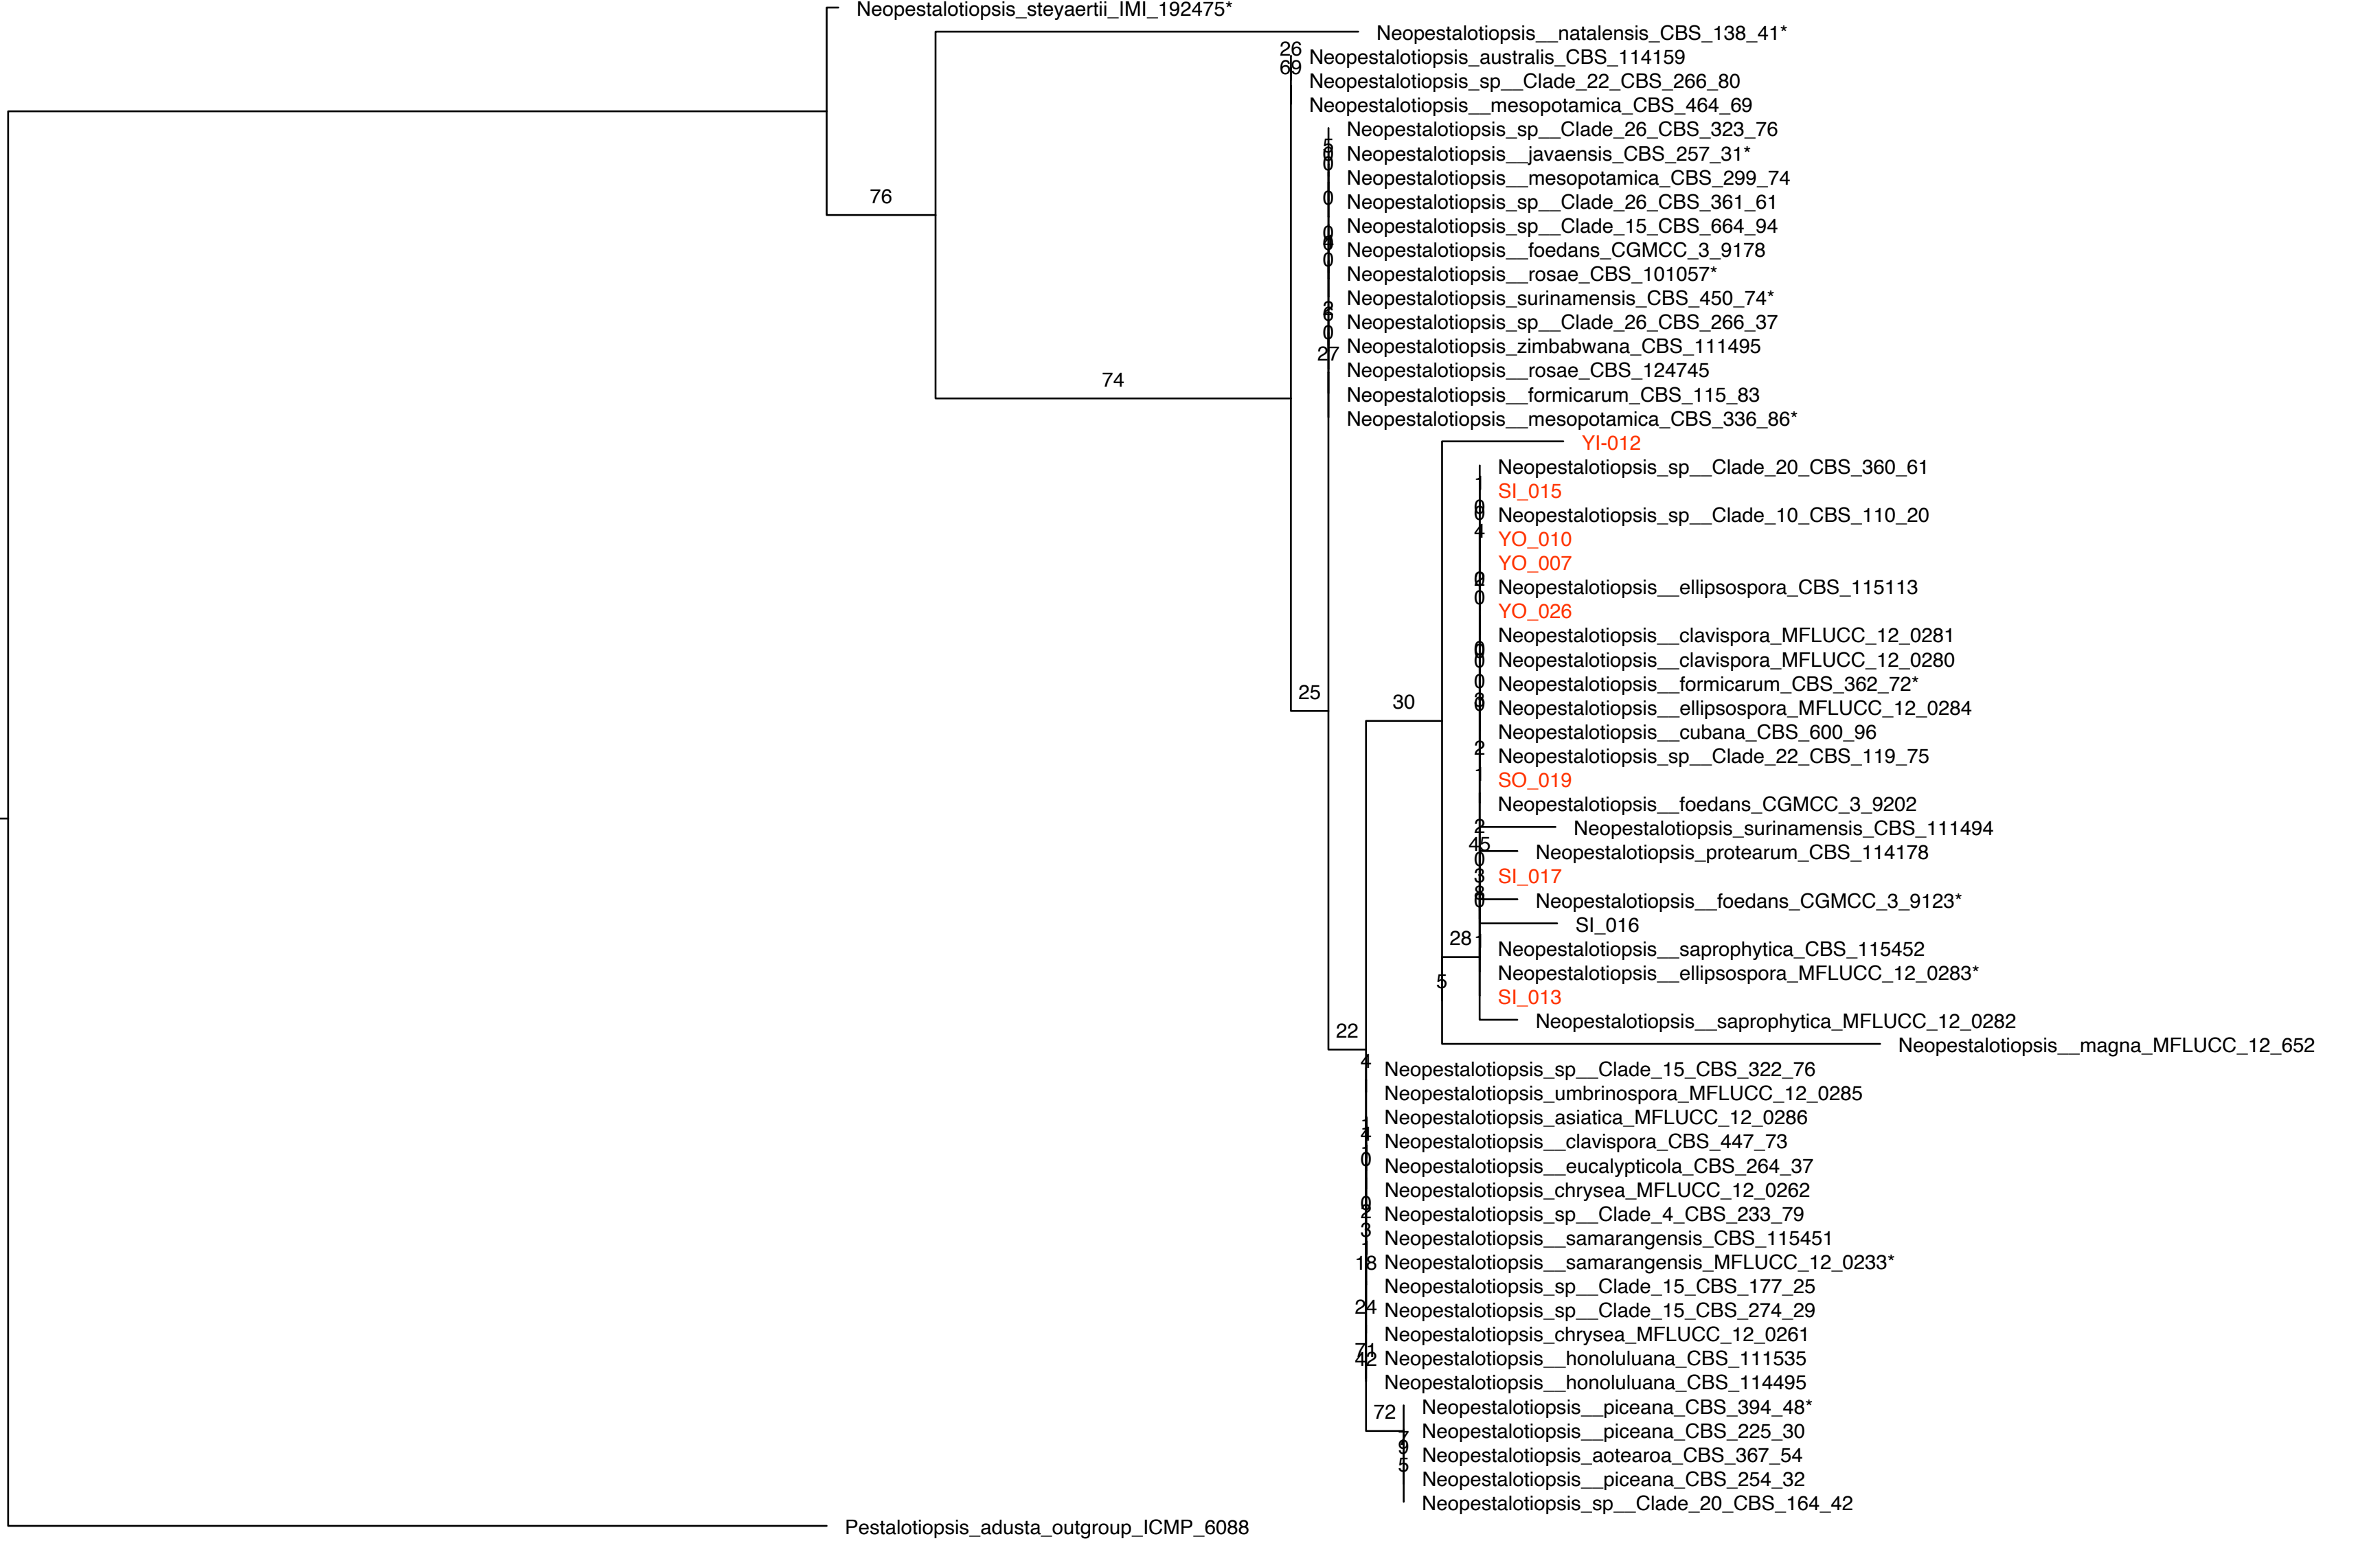

0.02

SO\_022

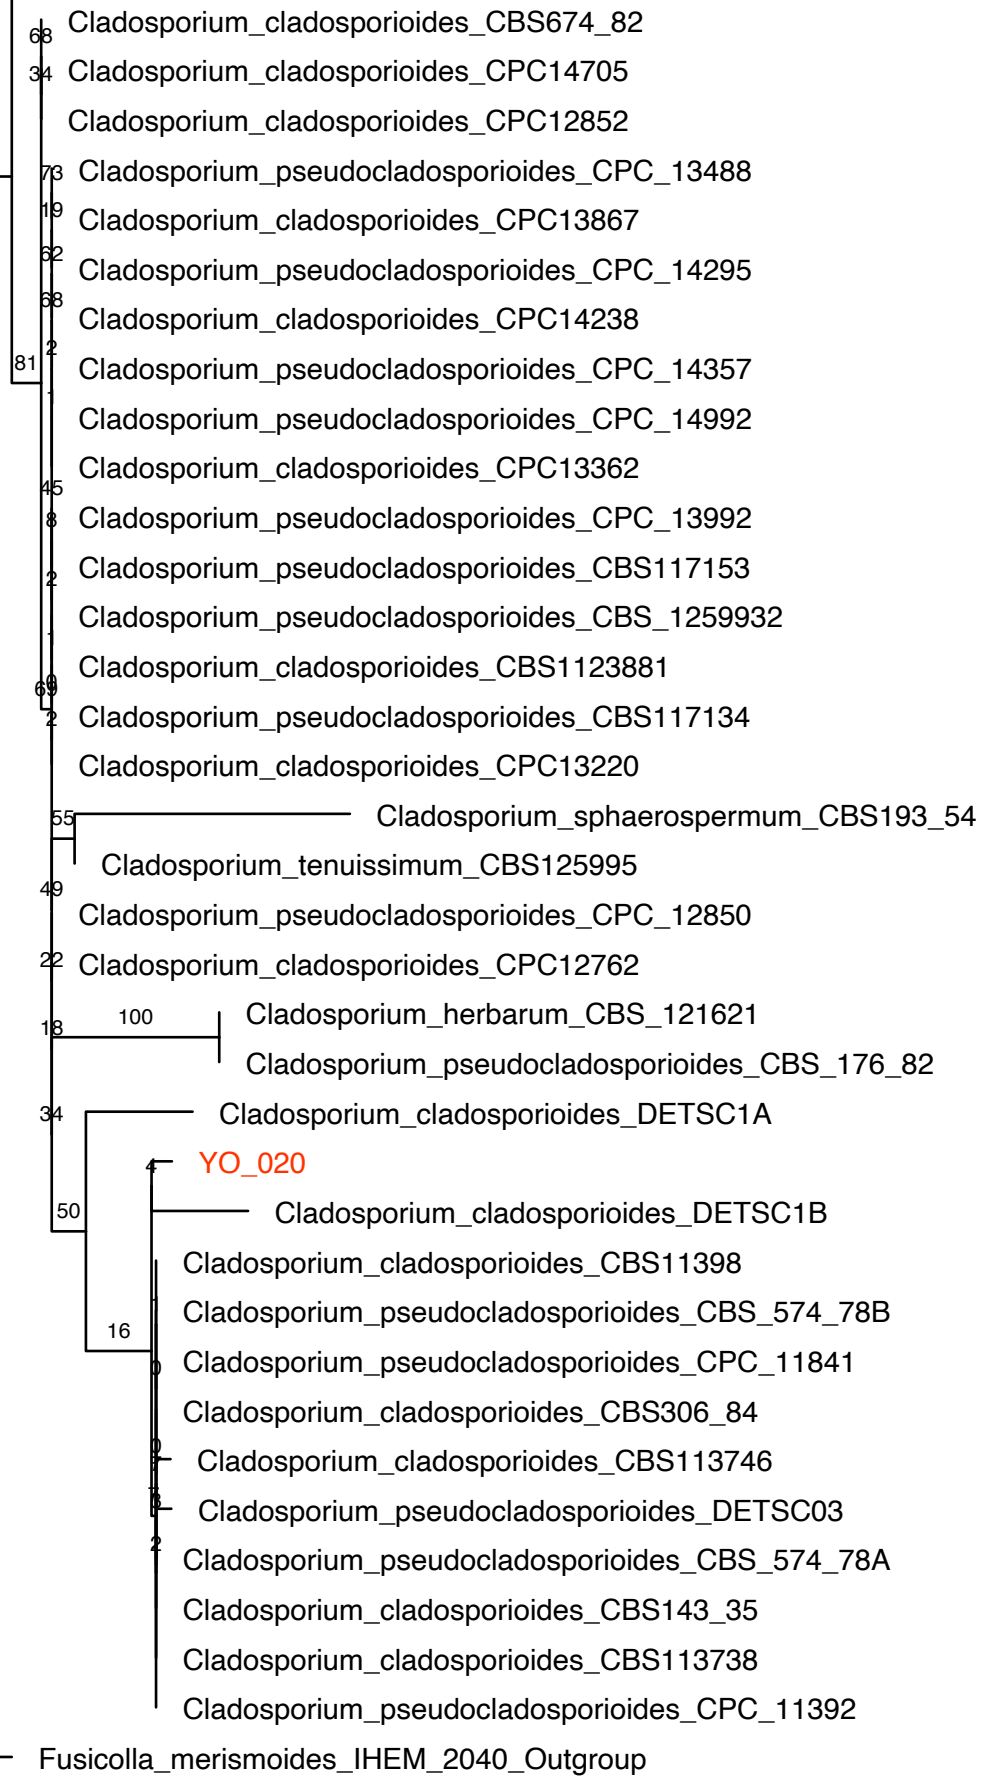

0.04



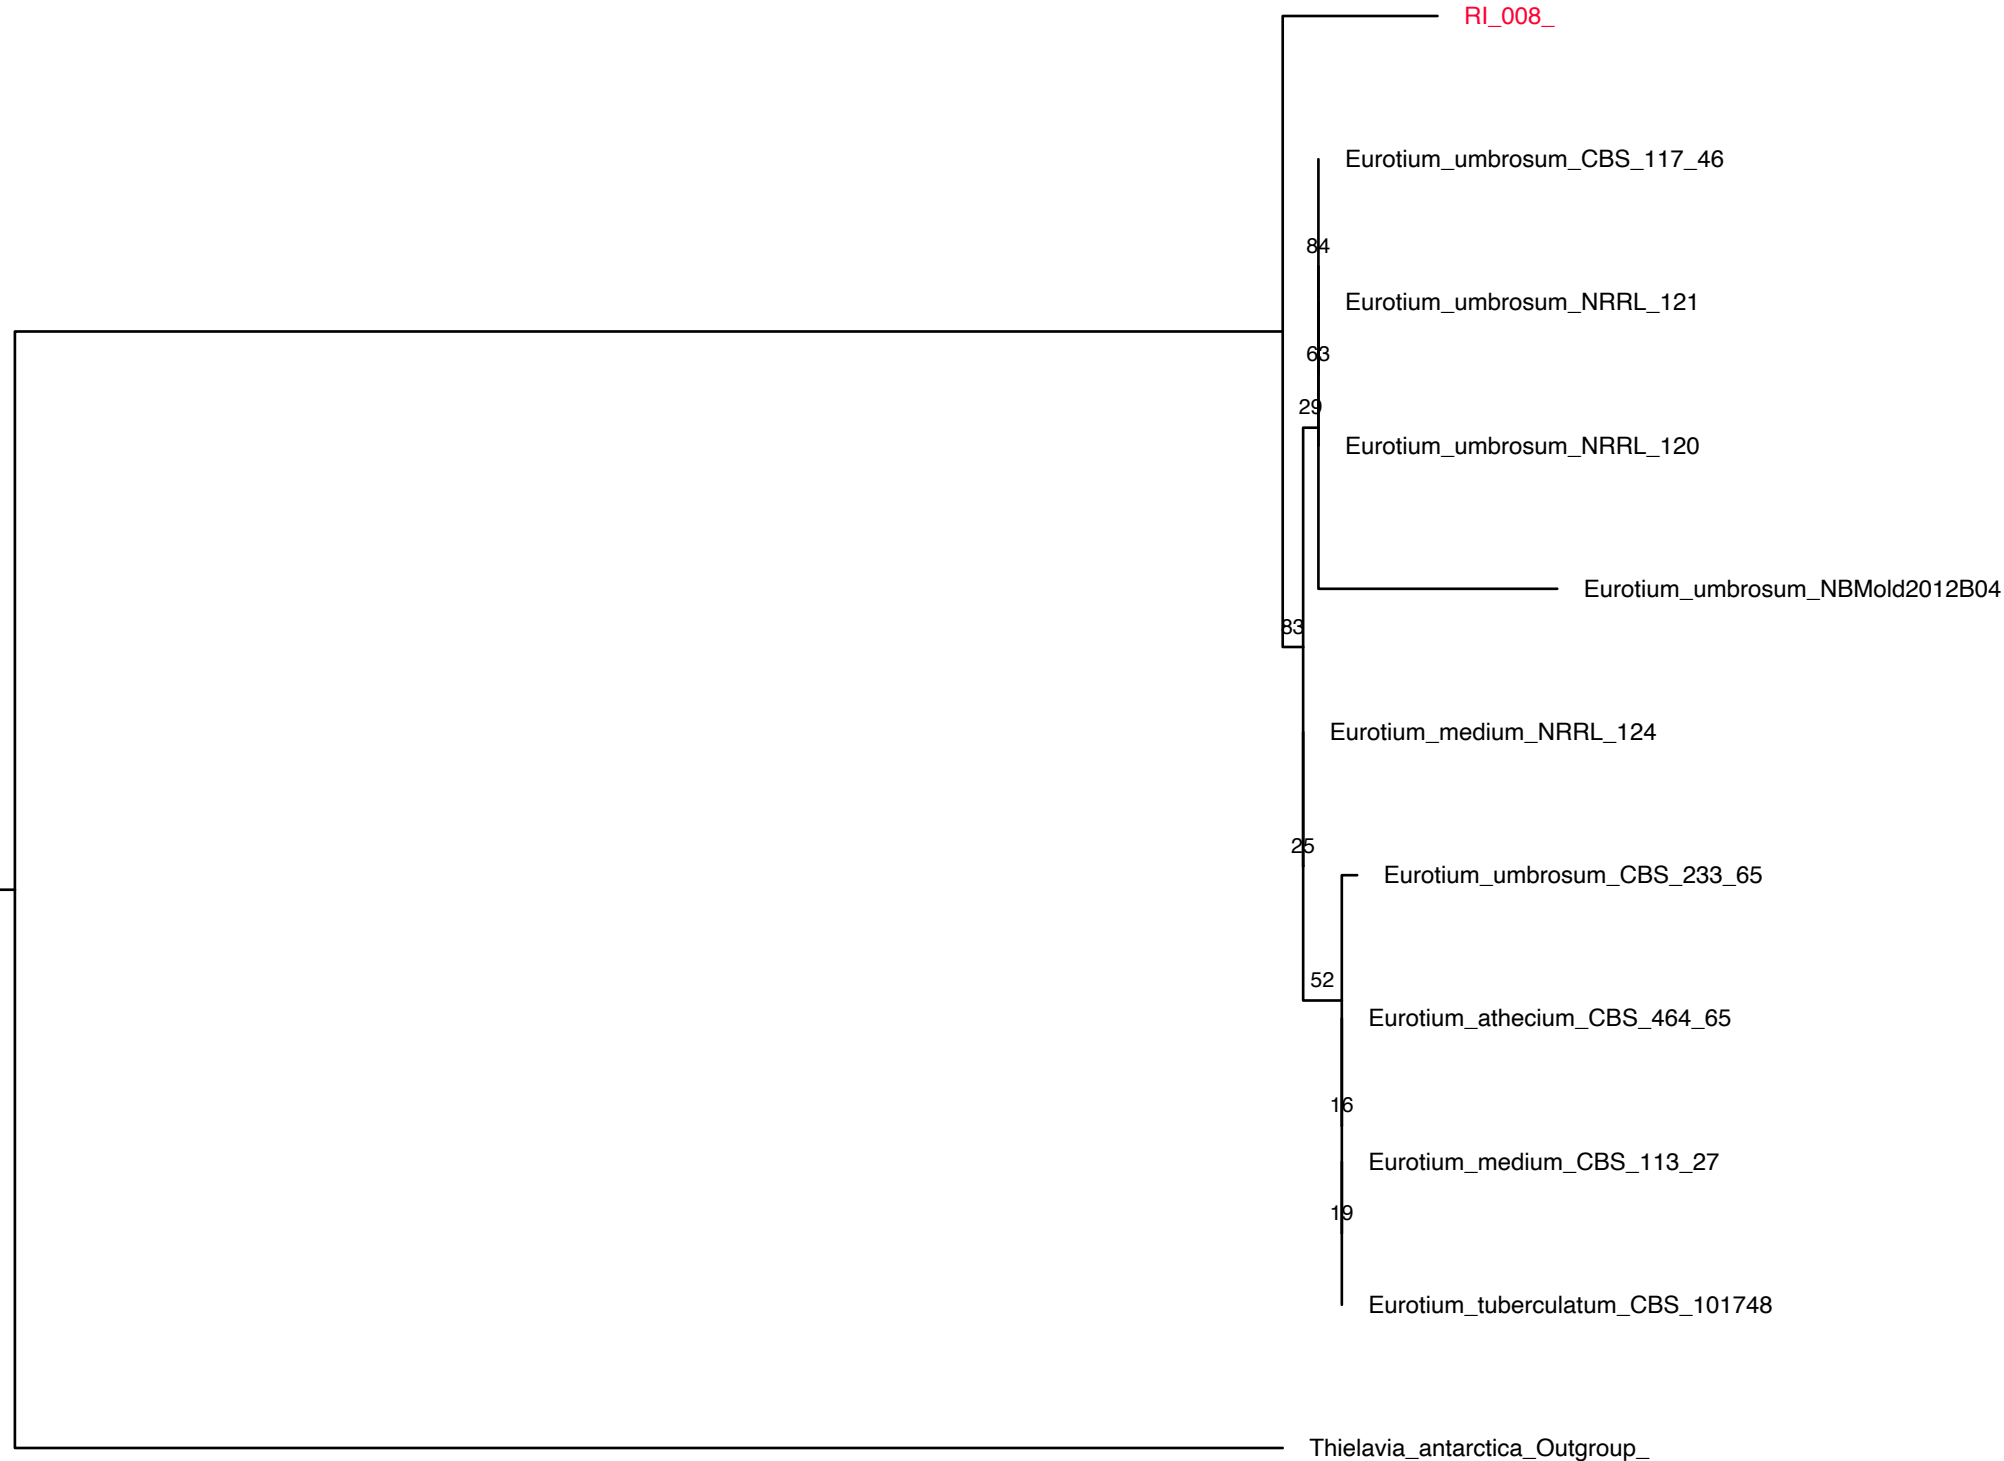

0.02

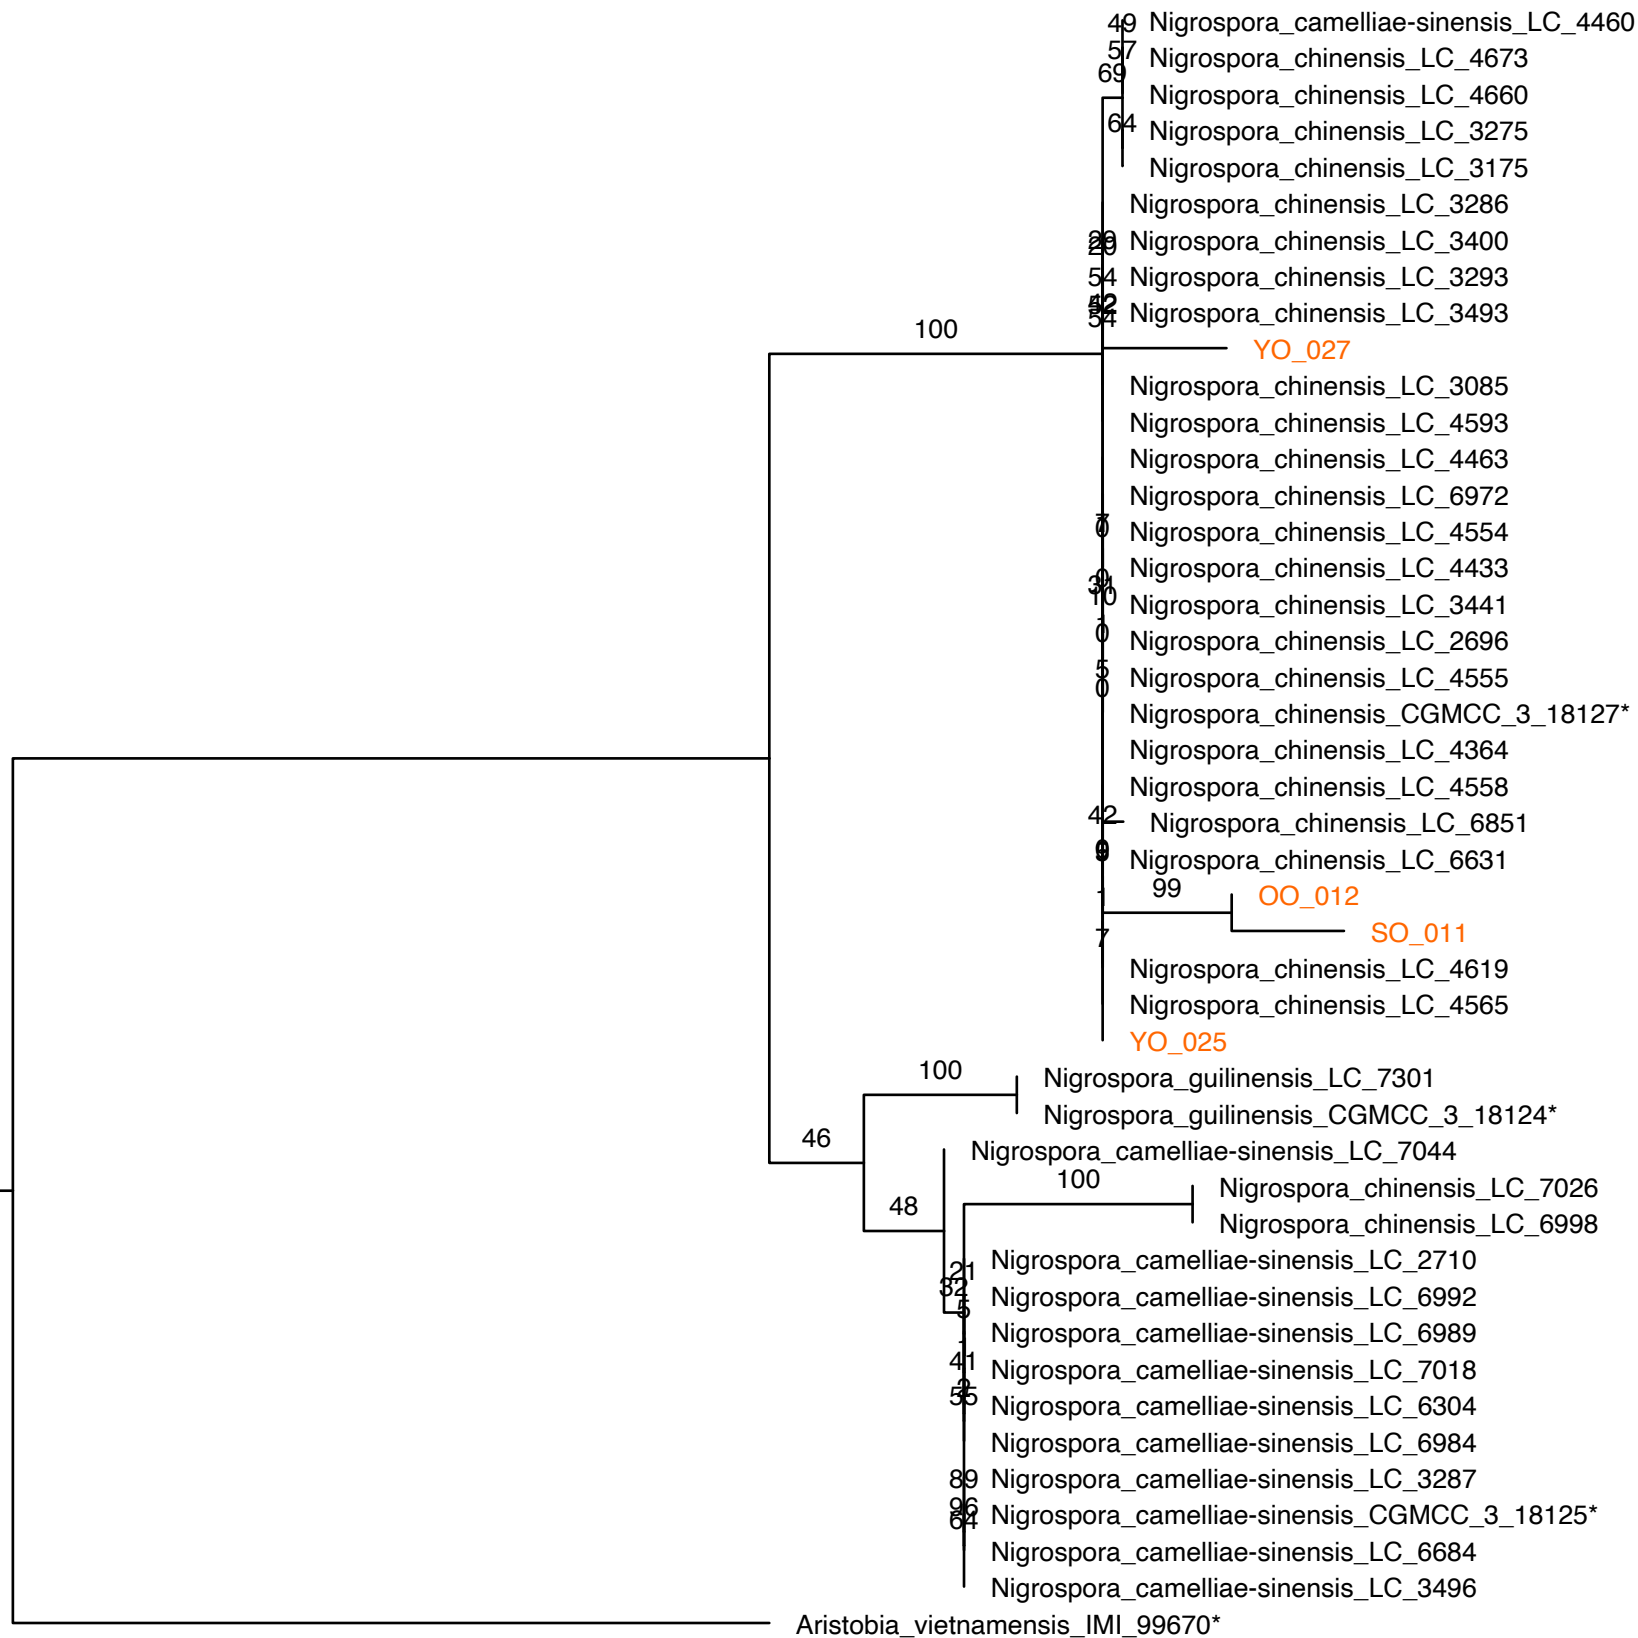

0.02

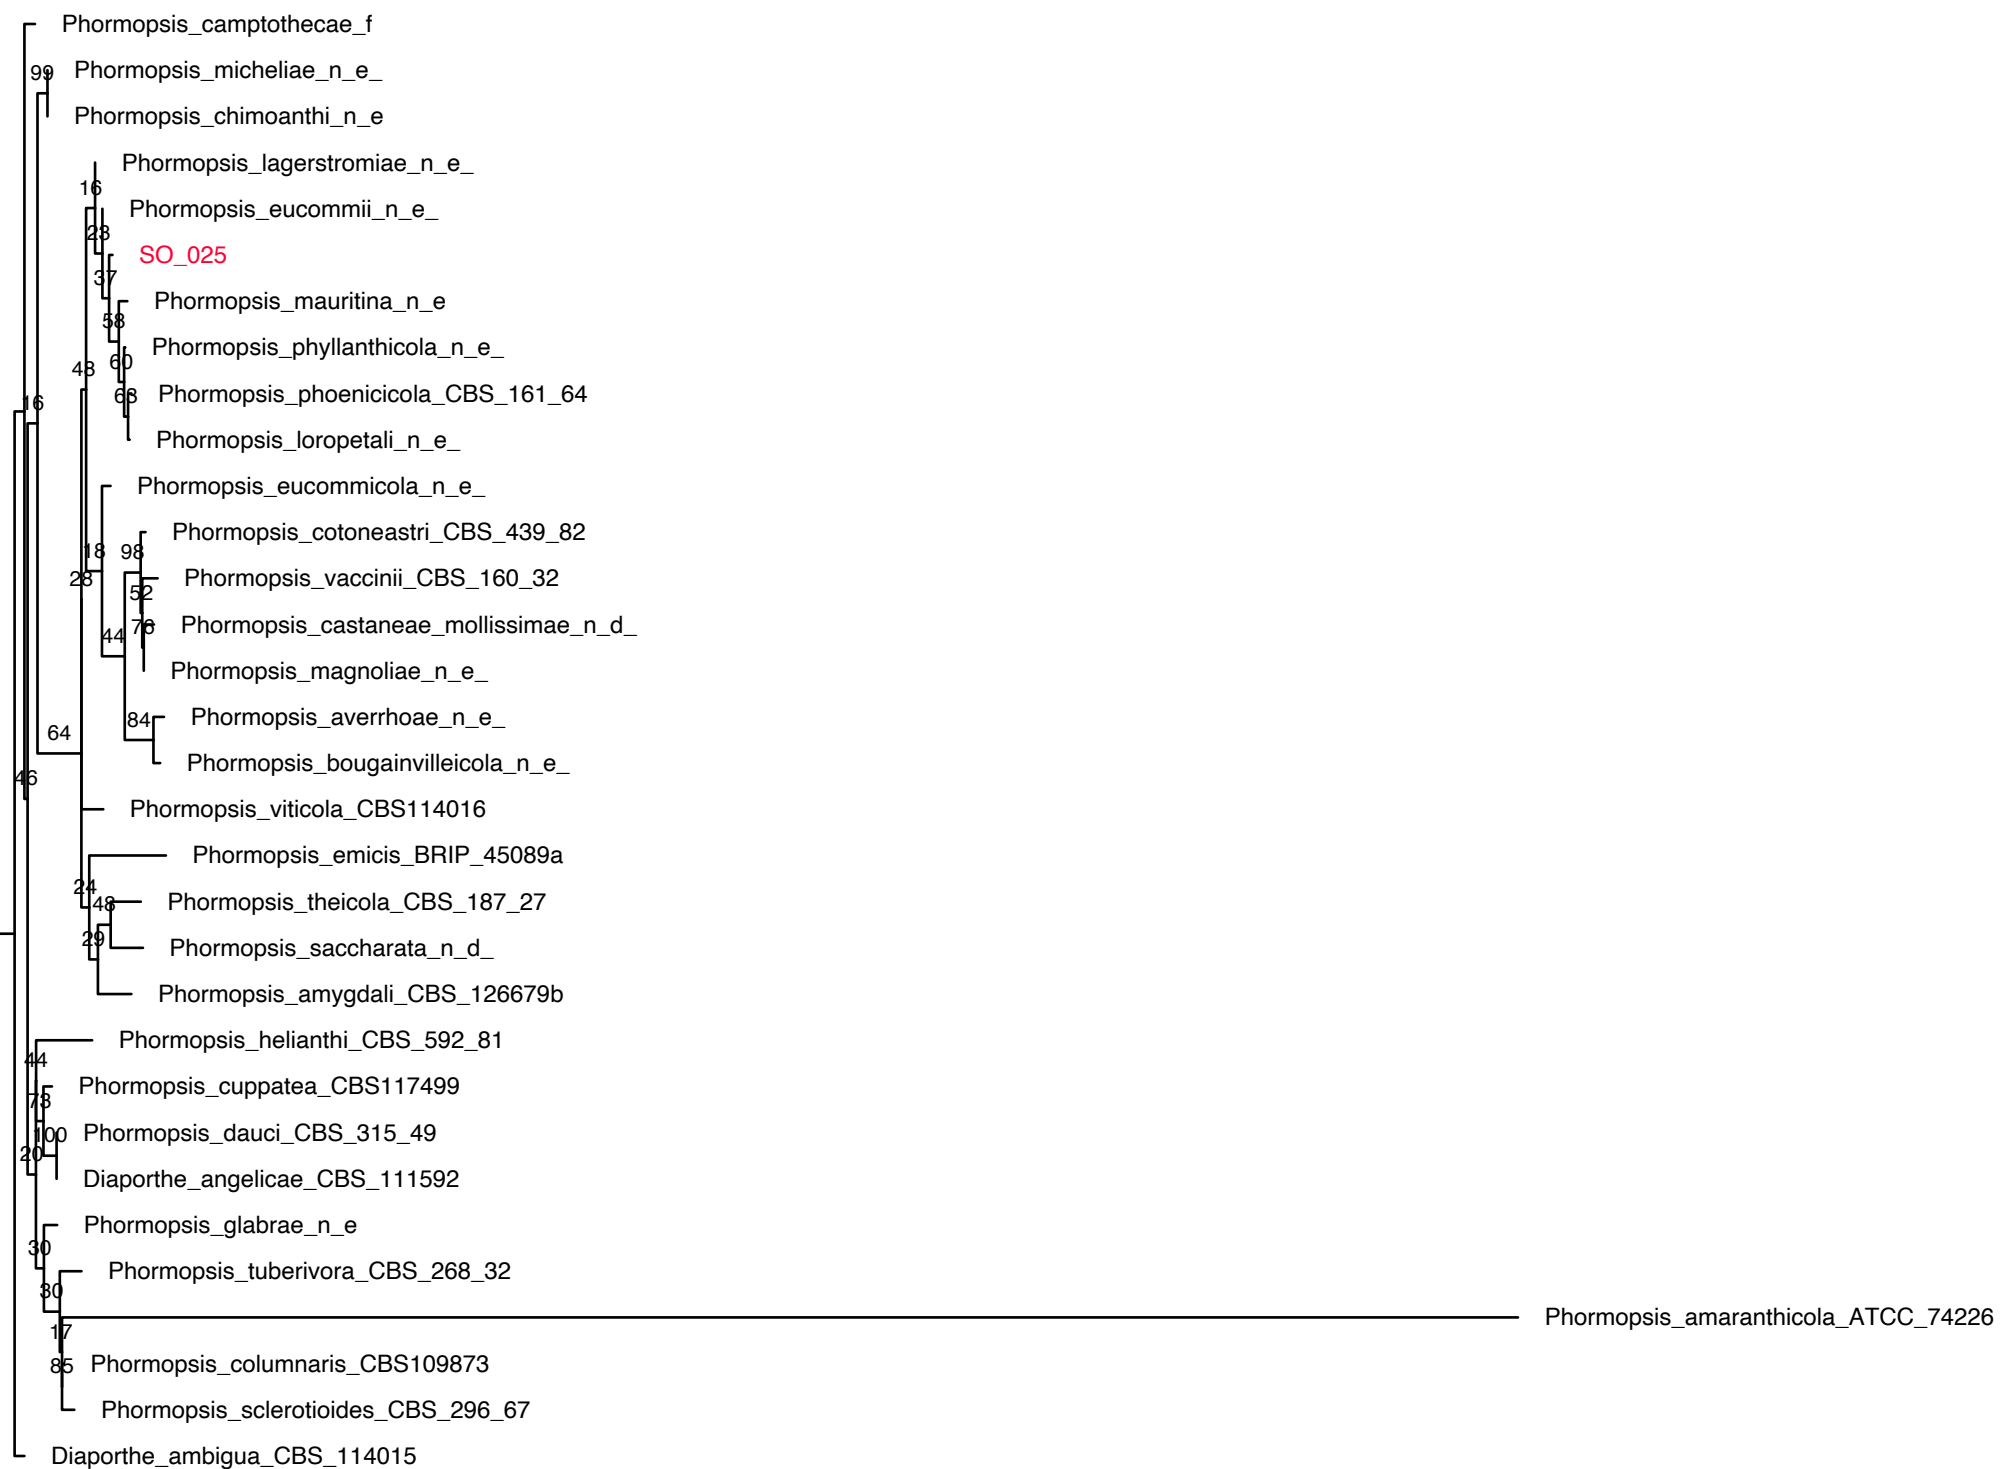

0.3

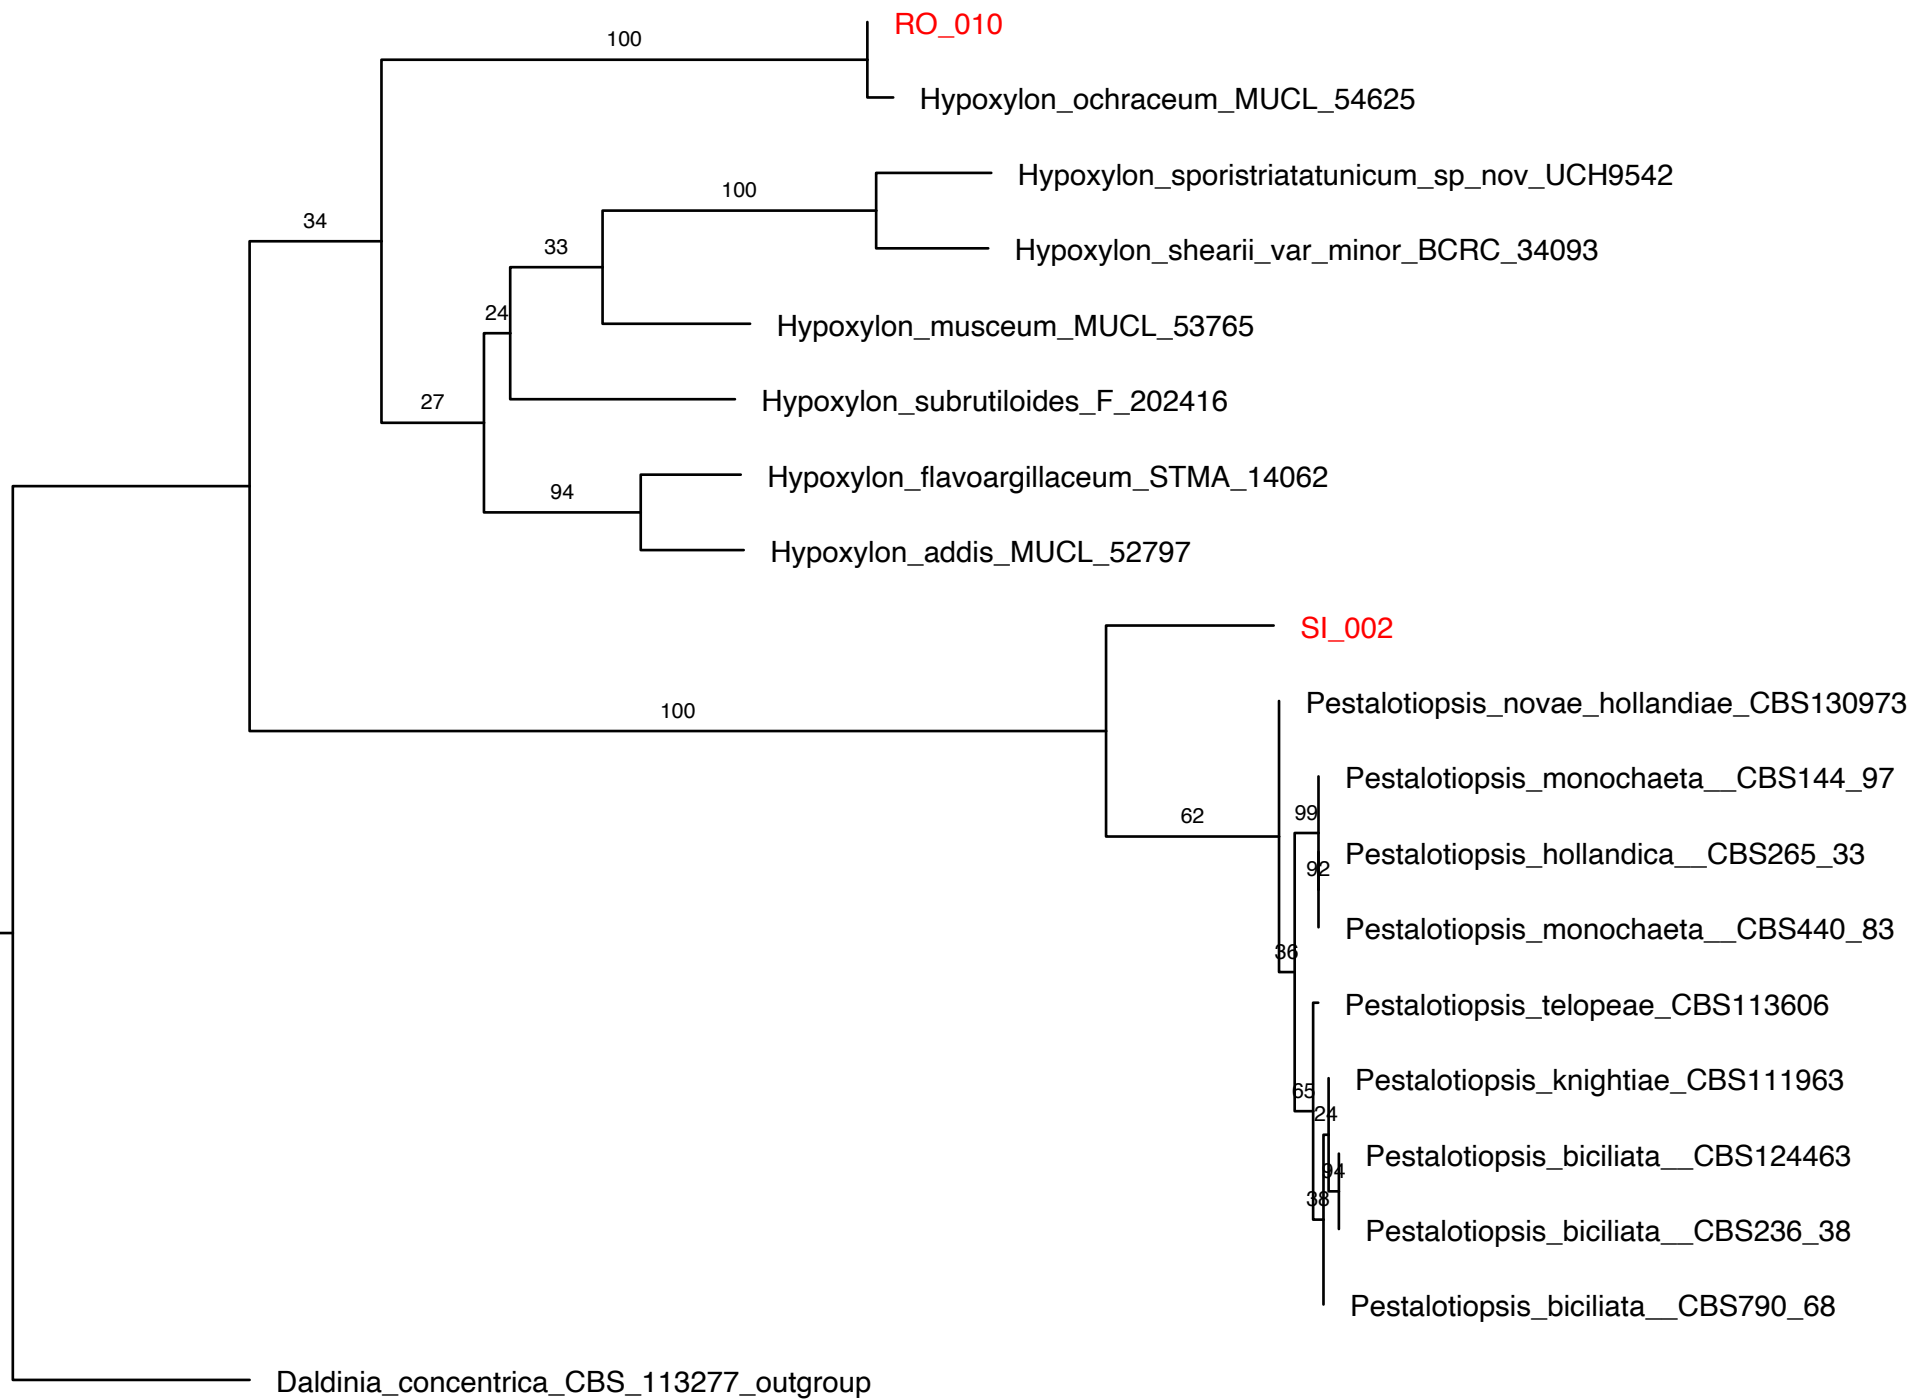

0.05



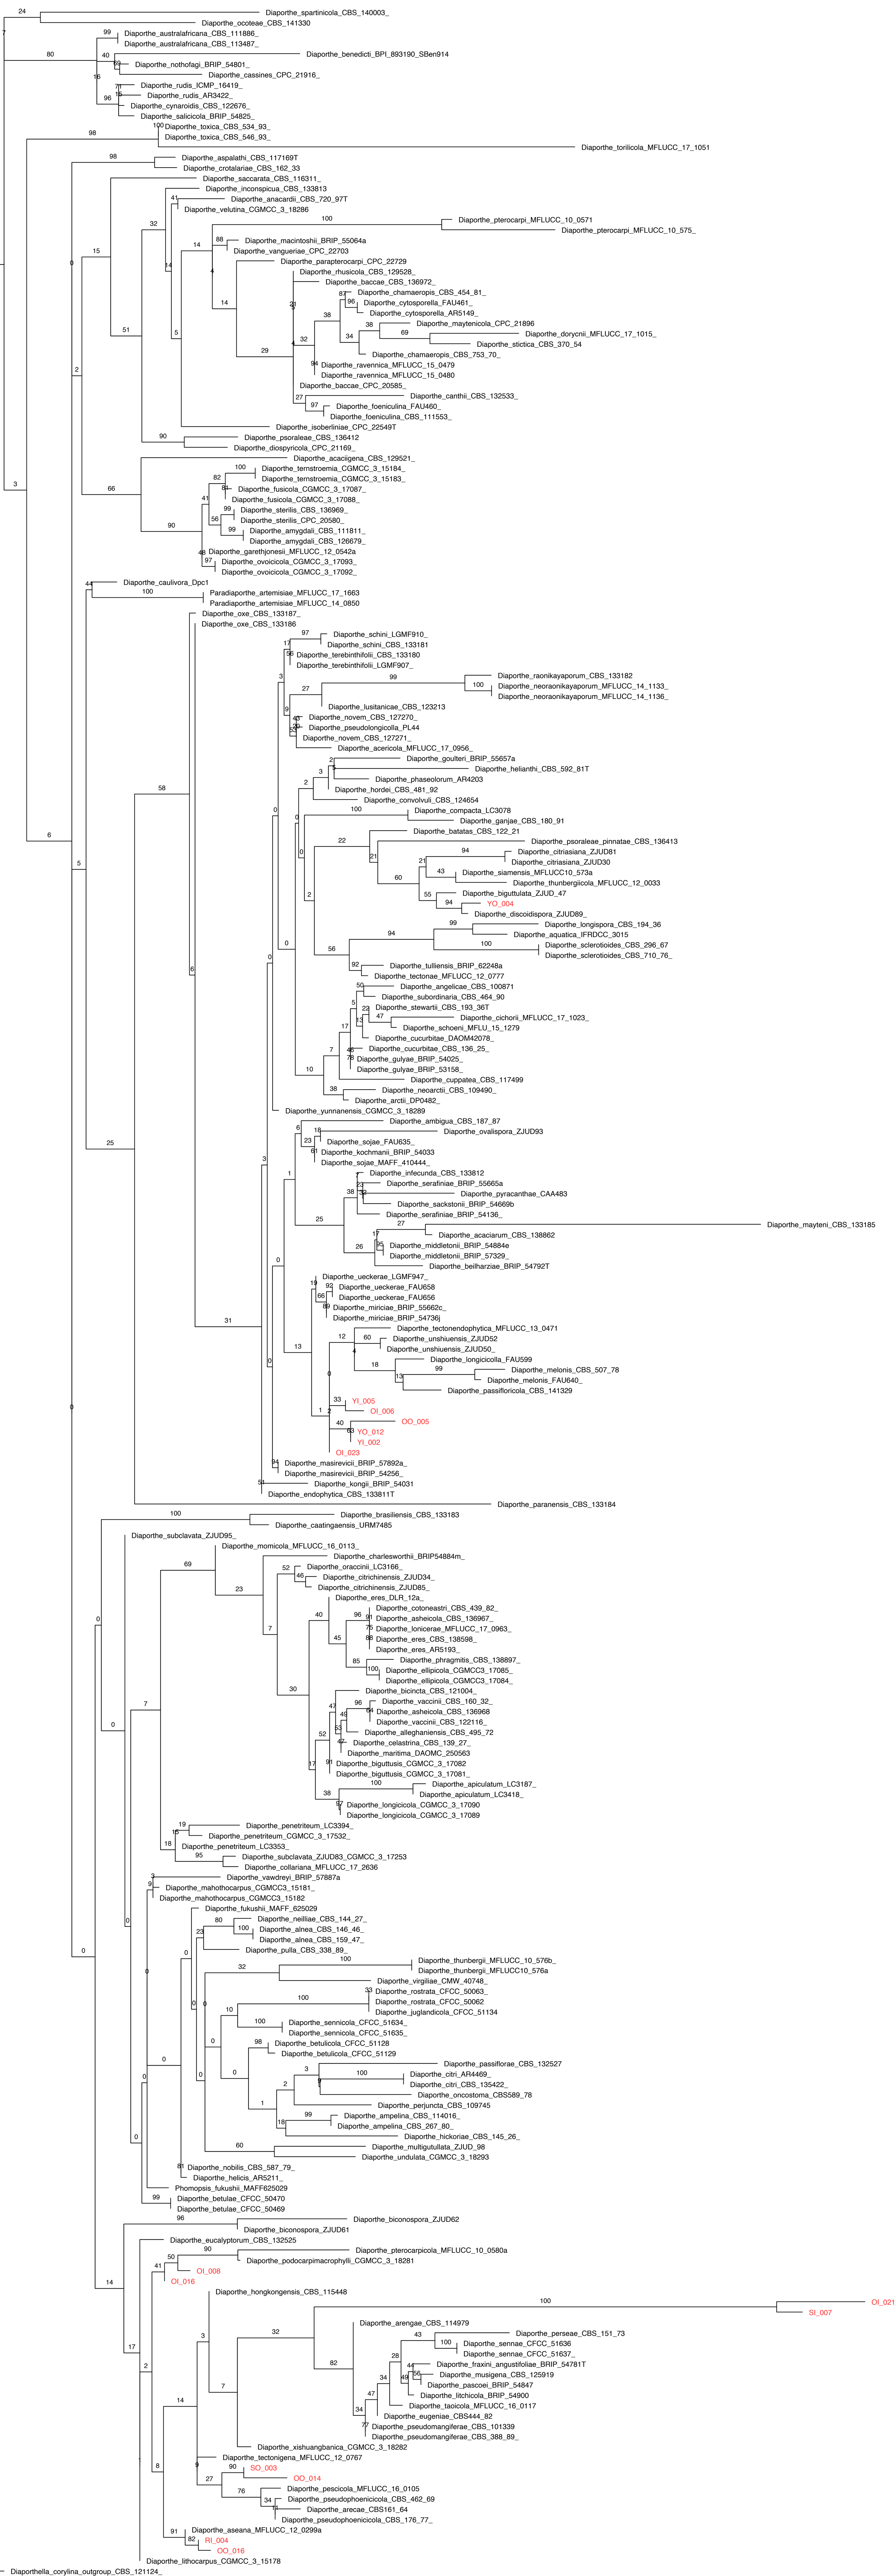

**Supplementary Figure S3.** Phylogenetic tree of 66 isolates based on the nucleotide sequences of rDNA-ITS. The isolates and their phylogenetic position based on the ITS region according to the RAxML analyses. Bootstrap support values for ML equal to or greater than 90%.



**Table S1.** Maximum nucleotide identity match for 66 fungal isolated based on ITS sequences using BLAST and phylogenetic tree analysis

| No. | Isolates ID | GenBank accession number | Database species                | Identity (%) | Accession number | Phylum, Class, Family                                |
|-----|-------------|--------------------------|---------------------------------|--------------|------------------|------------------------------------------------------|
| 1   | YI-002      | MT043777.1               | <i>Diaporthe sp.</i>            | 96.54%       | OM189555         | Ascomycota,<br>Sordariomycetes,<br>Nectriaceae,      |
| 2   | YI-005      | KP199195.1               | <i>Diaporthe sp.</i>            | 99.59%       | OM190460         | Ascomycota,<br>Sordariomycetes,<br>Diaporthaceae     |
| 3   | YI-008      | HQ832808.1               | <i>Pleosporales sp.</i>         | 99.48%       | OM190401         | Ascomycota,<br>Sordariomycetes,<br>Diaporthaceae     |
| 4   | YI-012      | MT576586.1               | <i>Neopestalotiopsis sp.</i>    | 99.20%       | OM149730         | Ascomycota,<br>Sordariomycetes,<br>Amphisphaeriaceae |
| 5   | OI-004      | MT560381.1               | <i>Fusarium oxysporum</i>       | 99.81%       | OM190461         | Ascomycota,<br>Sordariomycetes,<br>Diaporthaceae     |
| 6   | OI-006      | KF498865.1               | <i>Diaporthe sp.</i>            | 99.29%       | OM127751         | Ascomycota,<br>Sordariomycetes,<br>Amphisphaeriaceae |
| 7   | OI-008      | MG832475.1               | <i>Diaporthe sp.</i>            | 98.92%       | OM127832         | Ascomycota,<br>Sordariomycetes,<br>Diaporthaceae     |
| 8   | OI-010      | MT322075.1               | <i>Pseudopestalotiopsis sp.</i> | 99.82%       | OM127833         | Ascomycota,<br>Sordariomycetes,<br>Diaporthaceae     |
| 9   | OI-016      | MG832475.1               | <i>Diaporthe sp.</i>            | 98.75%       | OM127847         | Ascomycota,<br>Sordariomycetes,<br>Chaetomiaceae     |
| 10  | OI-019      | MT322091.1               | <i>Pseudopestalotiopsis sp.</i> | 83.25%       | OM127834         | Ascomycota,<br>Sordariomycetes,<br>Diaporthaceae     |
| 11  | OI-021      | KY790594.1               | <i>Diaporthe sp.</i>            | 97.84%       | OM190463         | Ascomycota,<br>Dothideomycetes<br>Didymosphaeriaceae |
| 12  | OI-023      | MK111104.1               | <i>Diaporthe sp.</i>            | 92.73%       | OM127848         | Ascomycota,<br>Sordariomycetes,<br>Chaetomiaceae     |
| 13  | SI-002      | MN486554.1               | <i>Neopestalotiosis sp.</i>     | 100%         | OM189550         | Ascomycota,<br>Eurotiomycetes,<br>Trichocomaceae.    |
| 14  | SI-007      | KY790594.1               | <i>Diaporthe sp.</i>            | 98.53%       | OM108436         | Ascomycota,<br>Sordariomycetes,<br>Chaetomiaceae     |

|    |        |            |                              |        |          |                                                       |
|----|--------|------------|------------------------------|--------|----------|-------------------------------------------------------|
| 15 | SI-012 | MN486561.1 | <i>Clonostachys sp.</i>      | 100%   | OM189548 | Ascomycota,<br>Sordariomycetes,<br>Xylariaceae        |
| 16 | SI-013 | MT151848.1 | <i>Neopestalotiopsis sp.</i> | 99.63% | OM189547 | Ascomycota,<br>Sordariomycetes,<br>Diaporthaceae      |
| 17 | SI-015 | LC412067.1 | <i>Neopestalotiopsis sp.</i> | 100%   | OM117569 | Ascomycota,<br>Sordariomycetes,<br>Bionectriaceae     |
| 18 | SI-016 | MK278906.1 | <i>Neopestalotiopsis sp.</i> | 99.41% | OM135584 | Ascomycota,<br>Sordariomycetes,<br>Sporocadaceae      |
| 19 | SI-017 | MT322103.1 | <i>Neopestalotiopsis sp.</i> | 100%   | OM117591 | Ascomycota,<br>Sordariomycetes,<br>Sporocadaceae      |
| 20 | RI-003 | MN341327.1 | <i>Chaetomium sp.</i>        | 98.65% | OM124054 | Ascomycota,<br>Sordariomycetes,<br>Sporocadaceae      |
| 21 | RI-004 | KF159984.1 | <i>Diaporthe aseana</i>      | 84.58% | OM135374 | Ascomycota,<br>Sordariomycetes,<br>Sporocadaceae      |
| 22 | RI-005 | MT112308.1 | <i>Roussoella sp.</i>        | 99.40% | OM124055 | Ascomycota,<br>Sordariomycetes,<br>Diaporthaceae      |
| 23 | RI-007 | MH855939.1 | <i>Chaetomium sp.</i>        | 97.61% | OM124056 | Ascomycota,<br>Sordariomycetes,<br>Diaporthaceae      |
| 24 | RI-008 | KJ863518.1 | <i>Eurotium sp.</i>          | 99.81% | OM124069 | Ascomycota,<br>Dothideomycetes,<br>Pleosporomycetidae |
| 25 | RI-012 | MN886594.1 | <i>Ovatospora sp.</i>        | 99.64% | OM169009 | Ascomycota,<br>Sordariomycetes,<br>Sporocadaceae      |
| 26 | YO-002 | KU529845.1 | <i>Phaeosphaeriopsis sp.</i> | 99.42% | OM125263 | Ascomycota,<br>Sordariomycetes,<br>Diaporthaceae      |
| 27 | YO-004 | MN816409.1 | <i>Diaporthe sp.</i>         | 99.09% | OM190448 | Ascomycota,<br>Sordariomycetes,<br>Nectriaceae,       |
| 28 | YO-007 | MT019206.1 | <i>Neopestalotiopsis sp.</i> | 99.81% | OM190449 | Ascomycota,<br>Dothideomycetes,<br>Pleosporomycetidae |
| 29 | YO-008 | KM434268.1 | <i>Phaeosphaeriopsis sp.</i> | 98.57% | OM125357 | Ascomycota,<br>Dothideomycetes<br>Pleosporaceae       |
| 30 | YO-010 | MT151848.1 | <i>Neopestalotiopsis sp.</i> | 99.81% | OM190441 | Ascomycota,                                           |

|    |        |             |                                 |        |          |                                                       |
|----|--------|-------------|---------------------------------|--------|----------|-------------------------------------------------------|
|    |        |             |                                 |        |          | Sordariomycetes,<br>Trichosphaeriaceae                |
| 31 | YO-012 | MT043777.1  | <i>Diaporthe sp.</i>            | 99.64% | OM190454 | Ascomycota,<br>Sordariomycetes,<br>Diaporthaceae      |
| 32 | YO-020 | MT645944.1  | <i>Cladosporium sp.</i>         | 87.21% | OM200353 | Ascomycota,<br>Sordariomycetes,<br>Diaporthaceae      |
| 33 | YO-024 | MK909901.1  | <i>Pseudopestalotiopsis sp.</i> | 100 %  | OM190458 | Ascomycota,<br>Dothideomycetes<br>Pleosporaceae       |
| 34 | YO-025 | MW186168.1  | <i>Nigrospora sp.</i>           | 100%   | OM190457 | Ascomycota,<br>Sordariomycetes,<br>Glomerellaceae     |
| 35 | YO-026 | MT151848.1  | <i>Neopestalotiopsis sp.</i>    | 99.81% | OM190453 | Ascomycota,<br>Sordariomycetes,<br>Amphisphaeriaceae  |
| 36 | YO-027 | MW186168.1  | <i>Nigrospora sp.</i>           | 99.81% | OM200315 | Ascomycota,<br>Sordariomycetes,<br>Nectriaceae        |
| 37 | OO-005 | FJ79938.1   | <i>Diaporthe sp.</i>            | 99.65% | OM190402 | Ascomycota,<br>Sordariomycetes,<br>Apiosporaceae      |
| 38 | OO-008 | MT928791.1  | <i>Fusarium sp.</i>             | 100%   | OM189553 | Ascomycota,<br>Sordariomycetes,<br>Nectriaceae,       |
| 39 | OO-009 | HQ832808.1  | <i>Pleosporales sp.</i>         | 99.65% | OM190403 | Ascomycota,<br>Dothideomycetes<br>Didymosphaeriaceae  |
| 40 | OO-010 | MH884141.1  | <i>Alternaria sp.</i>           | 100%   | OM108317 | Ascomycota,<br>Sordariomycetes,<br>Nectriaceae,       |
| 41 | OO-012 | MH979024.1  | <i>Nigrospora sp.</i>           | 99.60% | OM131564 | Ascomycota,<br>Sordariomycetes,<br>Xylariaceae        |
| 42 | OO-014 | KX940974.1  | <i>Diaporthe sp.</i>            | 98.30% | OM131565 | Ascomycota,<br>Dothideomycetes,<br>Pleosporomycetidae |
| 43 | OO-016 | NR_154920.1 | <i>Diaporthe sp.</i>            | 99.27% | OM189552 | Ascomycota,<br>Sordariomycetes,<br>Bionectriaceae     |
| 44 | OO-018 | MH884078.1  | <i>Alternaria sp.</i>           | 100%   | OM131721 | Ascomycota,<br>Sordariomycetes,<br>Diaporthaceae      |
| 45 | OO-019 | KT218694.1  | <i>Colletotrichum sp.</i>       | 99.82% | OM189551 | Ascomycota,<br>Dothideomycetes,<br>Pleosporomycetidae |

|    |        |            |                                |        |          |                                                       |
|----|--------|------------|--------------------------------|--------|----------|-------------------------------------------------------|
| 46 | SO-001 | MN486561.1 | <i>Clonostachys sp.</i>        | 100%   | OM189543 | Ascomycota,<br>Sordariomycetes,<br>Amphisphaeriaceae  |
| 47 | SO-003 | MN651490.1 | <i>Diaporthe sp.</i>           | 99.45% | OM117688 | Ascomycota,<br>Dothideomycetes,<br>Botryosphaeriaceae |
| 48 | SO-006 | JQ809679.1 | <i>Pleosporales sp.</i>        | 99.82% | OM149384 | Ascomycota,<br>Sordariomycetes,<br>Trichosphaeriaceae |
| 49 | SO-007 | MT322085.1 | <i>Pseudopezalotiopsis sp.</i> | 97.61% | OM149386 | Ascomycota,<br>Dothideomycetes,<br>Pleosporomycetidae |
| 50 | SO-010 | EU677801.1 | <i>Guignardia sp.</i>          | 100%   | OM149387 | Ascomycota,<br>Sordariomycetes,<br>Nectriaceae,       |
| 51 | SO-011 | MH979024.1 | <i>Nigrospora sp.</i>          | 98.59% | OM149390 | Ascomycota,<br>Dothideomycetes,<br>Pleosporomycetidae |
| 52 | SO-013 | HQ832808.1 | <i>Pleosporales sp.</i>        | 97.56% | OM149392 | Ascomycota,<br>Sordariomycetes,<br>Sporocadaceae      |
| 53 | SO-014 | KF918554.1 | <i>Fusarium sp.</i>            | 99.46% | OM190412 | Ascomycota,<br>Dothideomycetes,<br>Davidiellaceae     |
| 54 | SO-015 | HQ832808.1 | <i>Pleosporales sp.</i>        | 98.95% | OM149713 | Ascomycota,<br>Dothideomycetes,<br>Pleosporomycetidae |
| 55 | SO-019 | MT151848.1 | <i>Neopezalotiopsis sp.</i>    | 99.81% | OM190406 | Ascomycota,<br>Sordariomycetes,<br>Valsaceae          |
| 56 | SO-022 | MG209675.1 | <i>Cladosporium sp.</i>        | 99.02% | OM149718 | Ascomycota,<br>Dothideomycetes,<br>Phaeosphaeriaceae  |
| 57 | SO-024 | HQ832808.1 | <i>Pleosporales sp.</i>        | 89.93% | OM190404 | Ascomycota,<br>Sordariomycetes,<br>Diaporthaceae      |
| 58 | SO-025 | MF800892.1 | <i>Phomopsis sp.</i>           | 99.74% | OM189554 | Ascomycota,<br>Sordariomycetes,<br>Sporocadaceae      |
| 59 | RO-001 | MK909901.1 | <i>Pseudopezalotiopsis sp.</i> | 99.63% | OM190466 | Ascomycota,<br>Dothideomycetes,<br>Phaeosphaeriaceae  |
| 60 | RO-002 | MT928794.1 | <i>Fusarium sp.</i>            | 100%   | OM108320 | Ascomycota,<br>Sordariomycetes,<br>Sporocadaceae      |
| 61 | RO-004 | NR166043.1 | <i>Arthrinium sp.</i>          | 91.33% | OM108434 | Ascomycota,<br>Sordariomycetes,                       |

|    |        |            |                         |        |          |                                                       |
|----|--------|------------|-------------------------|--------|----------|-------------------------------------------------------|
|    |        |            |                         |        |          | Diaporthaceae                                         |
| 62 | RO-005 | MT560381.1 | <i>Fusarium sp.</i>     | 92.68% | OM149376 | Ascomycota,<br>Dothideomycetes,<br>Davidiellaceae     |
| 63 | RO-007 | MT112308.1 | <i>Roussoella sp.</i>   | 96.93% | OM112302 | Ascomycota,<br>Sordariomycetes,<br>Amphisphaeriaceae  |
| 64 | RO-009 | KP050556.1 | <i>Fusarium sp.</i>     | 99.81  | OM190483 | Ascomycota,<br>Sordariomycetes,<br>Trichosphaeriaceae |
| 65 | RO-010 | KC968937.1 | <i>Hypoxylon sp.</i>    | 93.42% | OM135271 | Ascomycota,<br>Sordariomycetes,<br>Sporocadaceae      |
| 66 | RO-013 | JQ809679.1 | <i>Pleosporales sp.</i> | 99.45% | OM123443 | Ascomycota,<br>Sordariomycetes,<br>Trichosphaeriaceae |
